# Supplementary material for: Cu(ii) PBS-bridged PMOs catalyzed one-pot synthesis of 1,4-disubstituted 1,2,3-triazoles in water through click chemistry
Source: Royal Society of Chemistry journal article supplement (doi:10.1039/c4ra04093g), 2014-01-01

## **Cu(II) PBS-bridged PMOs catalyzed one-pot synthesis of 1,4-disubstituted 1,2,3-triazoles in water through click chemistry**

**Avvari N. Prasad <sup>a,b</sup>, Benjaram M. Reddy <sup>a</sup>, Eun-Young Jeong <sup>b</sup>, Sang-Eon Park <sup>b,\*</sup>**

*<sup>a</sup>Inorganic and Physical Chemistry Division, CSIR-Indian Institute of Chemical Technology, Hyderabad – 500607, India*

*<sup>b</sup>Laboratory of Nano-Green Catalysis, Department of Chemistry, Inha University, 253 Yonghyun-dong, Incheon 402-751, Republic of Korea*

### **Supporting Information**

#### **List of Contents**

1. General information
2. Recyclability of the Cu(II) PBS-bridged PMO catalyst
2. <sup>1</sup>H NMR, and <sup>13</sup>C NMR of isolated compounds
3. <sup>1</sup>H NMR and <sup>13</sup>C NMR spectra of isolated compounds

1. **General information:**  $^1\text{H}$  and  $^{13}\text{C}$  NMR spectra were recorded on Agilent Innova 400 MHz spectrometer. Chemical shifts ( $\delta$ ) are given in parts per million (ppm) relative to tetramethylsilane (TMS), which is used as an internal standard, and coupling constants ( $J$ ) are reported in hertz (Hz). Splitting patterns of proton are described as s, d, dd, t, q, br s and m stand for the resonance multiplicities singlet, doublet, doublet of doublet, triplet, quartet, broad singlet and multiplet, respectively.

2. **Recyclability of the Cu(II) PBS-bridged PMO catalyst:** We carried out catalyst-recycling experiments by using benzyl bromide, sodium azide and phenylacetylene as the model reaction. Remarkably, the used Cu(II)-PBS-HPMO catalyst exhibited without any significant loss of activity and selectivity in terms of desired product up to five cycles.

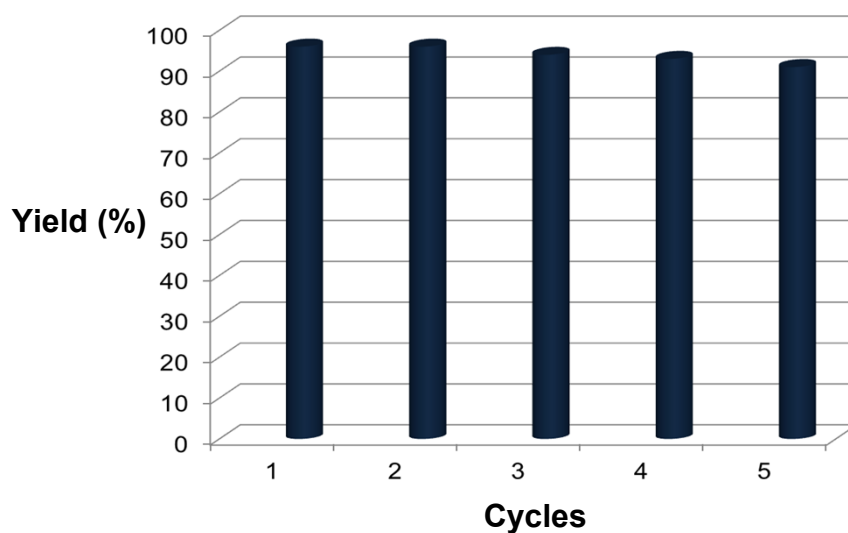

**Figure 1.** Recycling of Cu(II)-PBS-HPMO catalyst for the reaction between benzyl bromide, sodium azide and phenylacetylene.

2.  $^1\text{H}$  NMR and  $^{13}\text{C}$  NMR of isolated compounds:

Table 5, Entry 2: 1-Benzyl-4-phenyl-1*H*-1,2,3-triazole:

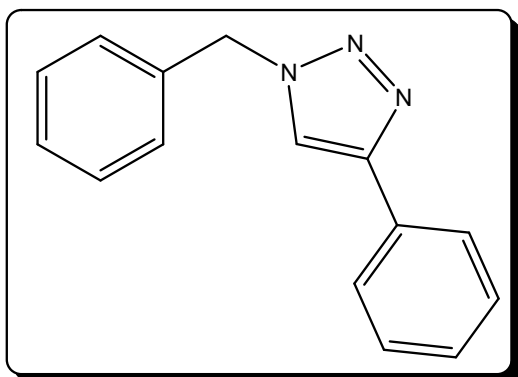

$^1\text{H}$  NMR ( $\text{CDCl}_3$ , 25  $^\circ\text{C}$ )  $\delta$  7.80-7.78 (m, 2H), 7.65 (s, 1H), 7.41-7.36 (m, 5H), 7.33-7.29 (m, 3H), 7.27-7.24 (m, 1H), 5.57 (s, 2H) ppm;  $^{13}\text{C}$  NMR ( $\text{CDCl}_3$ , 25  $^\circ\text{C}$ )  $\delta$  148.2, 134.6, 130.4, 129.1, 128.7, 128.1, 128.0, 127.1, 125.6, 119.4, 54.2 ppm.

Table 5, Entry 3: 2-((4-Phenyl-1*H*-1,2,3-triazol-1-yl)methyl)pyridine:

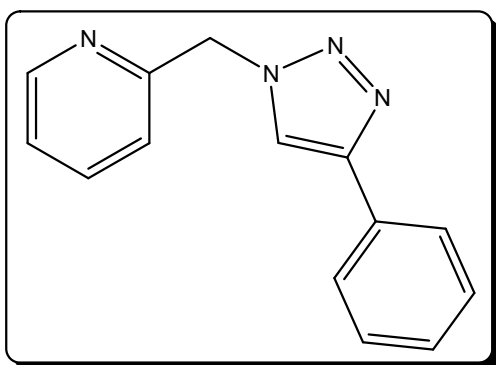

$^1\text{H}$  NMR ( $\text{CDCl}_3$ , 25  $^\circ\text{C}$ )  $\delta$  8.62-8.59 (m, 1H), 7.97-7.93 (m, 1H), 7.84-7.82 (m, 2H), 7.72-7.67 (m, 1H), 7.43-7.39 (m, 2H), 7.34-7.26 (m, 3H), 5.70 (s, 2H) ppm;  $^{13}\text{C}$  NMR ( $\text{CDCl}_3$ , 25  $^\circ\text{C}$ )  $\delta$  154.4, 149.7, 148.2, 137.3, 130.4, 128.7, 128.1, 125.7, 123.4, 122.4, 120.1, 55.7 ppm.

Table 5, Entry 4: 2-((4-*p*-Tolyl-1*H*-1,2,3-triazol-1-yl)methyl)pyridine:

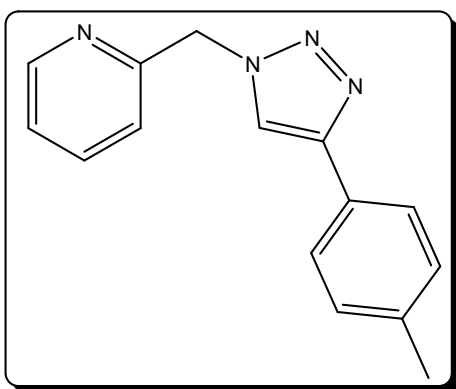

$^1\text{H}$  NMR ( $\text{CDCl}_3$ , 25  $^\circ\text{C}$ )  $\delta$  8.60 (s, 1H), 7.88 (s, 1H), 7.71-7.66 (m, 3H), 7.28-7.26 (m, 1H), 7.23-7.20 (m, 3H), 5.68 (s, 2H), 2.36 (s, 3H) ppm;  $^{13}\text{C}$  NMR ( $\text{CDCl}_3$ , 25  $^\circ\text{C}$ )  $\delta$  154.5, 149.6, 148.2, 137.9, 137.3, 129.4, 127.6, 125.5, 123.4, 122.4, 119.8, 55.6, 21.2 ppm.

**Table 5, Entry 5: 2-((4-(4-Fluorophenyl)-1H-1,2,3-triazol-1-yl)methyl)pyridine:**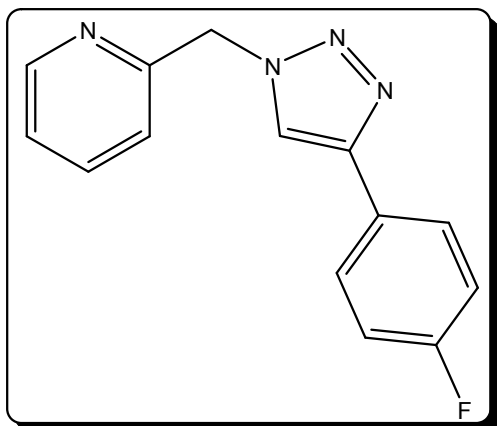

$^1\text{H}$  NMR ( $\text{CDCl}_3$ , 25  $^\circ\text{C}$ )  $\delta$  8.61-8.60 (d,  $J = 4.39$  Hz, 1H), 7.89 (s, 1H), 7.81-7.76 (m, 2H), 7.72-7.67 (m, 1H), 7.29-7.24 (m, 2H), 7.11-7.07 (m, 2H), 5.69 (s, 2H) ppm;  $^{13}\text{C}$  NMR ( $\text{CDCl}_3$ , 25  $^\circ\text{C}$ )  $\delta$  163.8, 154.3, 149.7, 147.3, 137.4, 127.4, 127.3, 126.7, 126.6, 123.5, 122.5, 119.9, 115.8, 115.6, 55.6 ppm.

**Table 5, Entry 6: 1-Benzyl-4-*p*-tolyl-1H-1,2,3-triazole:**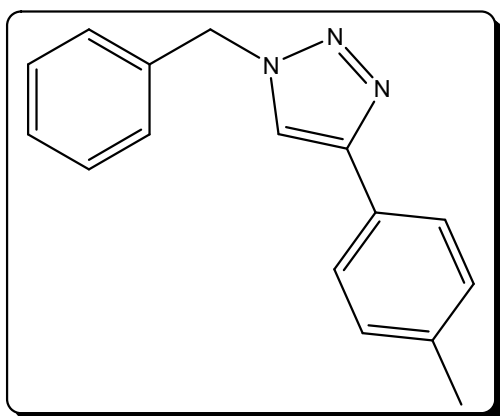

$^1\text{H}$  NMR ( $\text{CDCl}_3$ , 25  $^\circ\text{C}$ )  $\delta$  7.71-7.67 (m, 2H), 7.61 (s, 1H), 7.39-7.35 (m, 5H), 7.21-7.17 (m, 2H), 5.56 (s, 2H), 2.36 (s, 3H) ppm;  $^{13}\text{C}$  NMR ( $\text{CDCl}_3$ , 25  $^\circ\text{C}$ )  $\delta$  148.2, 137.9, 134.6, 129.4, 129.0, 128.6, 127.9, 127.6, 125.5, 119.1, 54.1, 21.2 ppm.

**Table 5, Entry 7: 1-(4-Methoxybenzyl)-4-*p*-tolyl-1H-1,2,3-triazole:**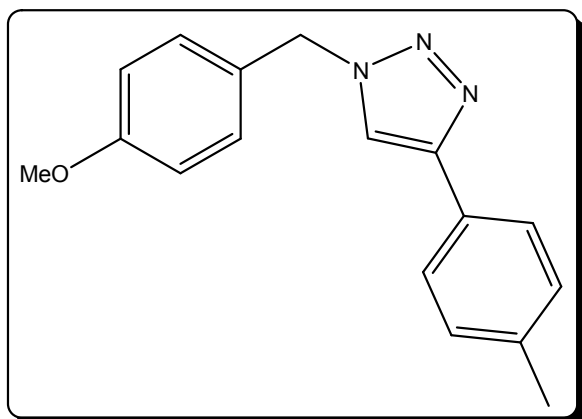

$^1\text{H}$  NMR ( $\text{CDCl}_3$ , 25  $^\circ\text{C}$ )  $\delta$  7.68-7.66 (d,  $J = 8.05$  Hz, 1H), 7.57 (s, 1H), 7.27-7.18 (m, 4H), 6.92-6.88 (m, 2H), 5.48 (s, 3H), 3.80 (s, 3H), 2.35 (s, 3H) ppm;  $^{13}\text{C}$  NMR ( $\text{CDCl}_3$ , 25  $^\circ\text{C}$ )  $\delta$  159.9, 148.1, 137.9, 129.6, 129.4, 127.7, 126.6, 125.5, 118.8, 114.4, 55.3, 53.7,

21.2 ppm.

**Table 5, Entry 8: 1-(4-Methoxybenzyl)-4-(4-fluorophenyl)-1*H*-1,2,3-triazole:**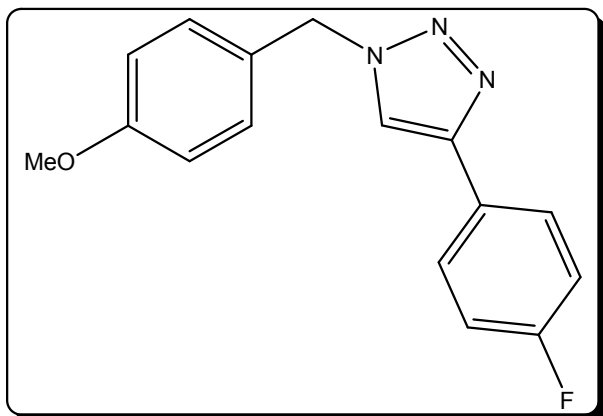

$^1\text{H}$  NMR ( $\text{CDCl}_3$ , 25  $^\circ\text{C}$ )  $\delta$  7.76–7.71 (m, 2H), 7.56 (s, 1H), 7.27–7.24 (m, 2H), 7.09–7.04 (m, 2H), 6.92–6.88 (m, 2H), 5.48 (s, 2H), 3.80 (s, 3H) ppm;  $^{13}\text{C}$  NMR ( $\text{CDCl}_3$ , 25  $^\circ\text{C}$ )  $\delta$  163.7, 159.8, 147.1, 129.6, 127.3, 127.2, 126.7, 126.4, 118.9, 115.7, 115.5, 114.4, 55.2, 53.7 ppm.

**Table 5, Entry 9: 1-(4-Methoxybenzyl)-4-phenyl-1*H*-1,2,3-triazole:**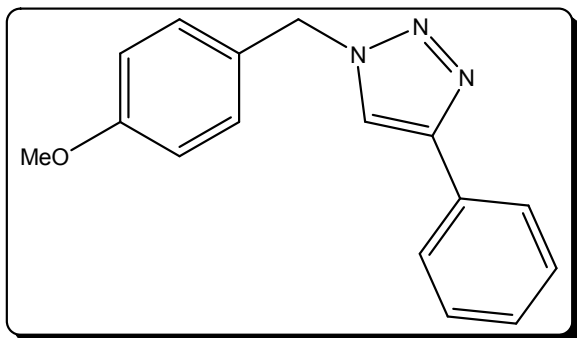

$^1\text{H}$  NMR ( $\text{CDCl}_3$ , 25  $^\circ\text{C}$ )  $\delta$  7.79–7.77 (m, 2H), 7.61 (s, 1H), 7.40–7.36 (m, 2H), 7.32–7.25 (m, 3H), 6.91–6.89 (m, 2H), 5.49 (s, 2H), 3.80 (s, 3H) ppm;  $^{13}\text{C}$  NMR ( $\text{CDCl}_3$ , 25  $^\circ\text{C}$ )  $\delta$  159.8, 148.0, 130.5, 129.5, 128.7, 128.0, 126.5, 125.5, 119.2, 114.4, 55.2, 53.6 ppm.

**Table 5, Entry 10: 1-Benzyl-4-(4-fluorophenyl)-1*H*-1,2,3-triazole:**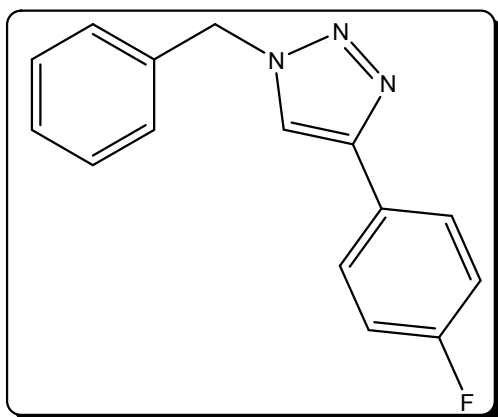

$^1\text{H}$  NMR ( $\text{CDCl}_3$ , 25  $^\circ\text{C}$ )  $\delta$  7.78–7.74 (m, 2H), 7.61 (s, 1H), 7.41–7.36 (m, 3H), 7.32–7.29 (m, 2H), 7.11–7.05 (m, 2H), 5.56 (s, 2H) ppm;  $^{13}\text{C}$  NMR ( $\text{CDCl}_3$ , 25  $^\circ\text{C}$ )  $\delta$  163.8, 147.3, 134.5, 129.1, 128.8, 128.0, 127.4, 127.3, 126.7, 119.1, 115.8, 115.6, 54.2 ppm.

**Table 5, Entry 12: 1-(4-Nitrobenzyl)-4-*p*-tolyl-1*H*-1,2,3-triazole:**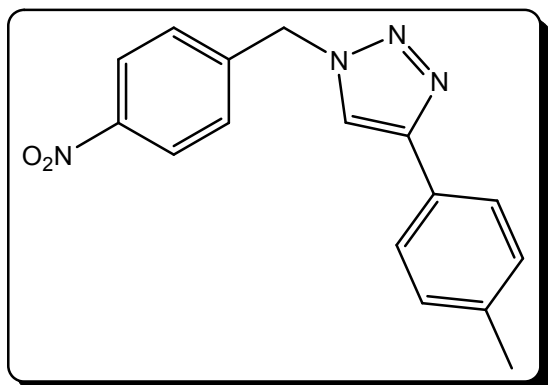

$^1\text{H}$  NMR ( $\text{CDCl}_3$ , 25  $^\circ\text{C}$ )  $\delta$  8.24-8.22 (d,  $J$  = 8.42 Hz, 2H), 7.70-7.68 (t,  $J$  = 4.7 Hz, 3H), 7.44-7.42 (d,  $J$  = 8.05 Hz, 2 H), 7.23-7.21 (d, 8.42 Hz, 2H), 5.68 (s, 2H), 2.37 (s, 3H) ppm;  
 $^{13}\text{C}$  NMR ( $\text{CDCl}_3$ , 25  $^\circ\text{C}$ )  $\delta$  147.9, 141.7, 138.3, 129.5, 128.4, 127.2, 125.5, 124.2, 53.07, 21.22 ppm.

**Table 5, Entry 13: 1-(4-Nitrobenzyl)-4-(4-fluorophenyl)-1*H*-1,2,3-triazole:**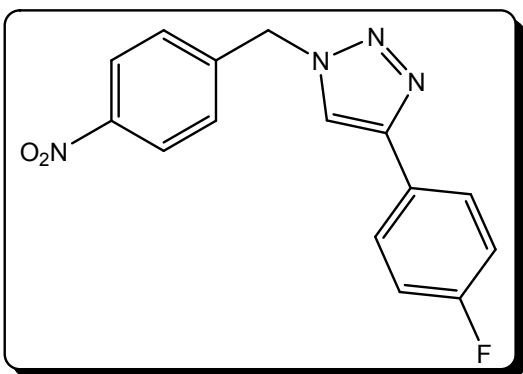

$^1\text{H}$  NMR ( $\text{CDCl}_3$ , 25  $^\circ\text{C}$ )  $\delta$  8.25-8.23 (d,  $J$  = 8.42 Hz, 2H), 7.79-7.76 (dd,  $J$  = 3.66, 8.42 Hz, 2H), 7.69 (s, 1H), 7.45-7.43 (d,  $J$  = 8.05 Hz, 2H), 7.13-7.08 (t,  $J$  = 8.42 Hz, 2H), 5.69 (s, 2H) ppm;  $^{13}\text{C}$  NMR ( $\text{CDCl}_3$ , 25  $^\circ\text{C}$ )  $\delta$  164.0, 148.1, 141.5, 128.5, 127.5, 127.4, 127.3,

126.3, 124.3, 116.0, 115.8, 53.2 ppm.

**Table 5, Entry 14: 1-(4-Bromobenzyl)-4-*p*-tolyl-1*H*-1,2,3-triazole:**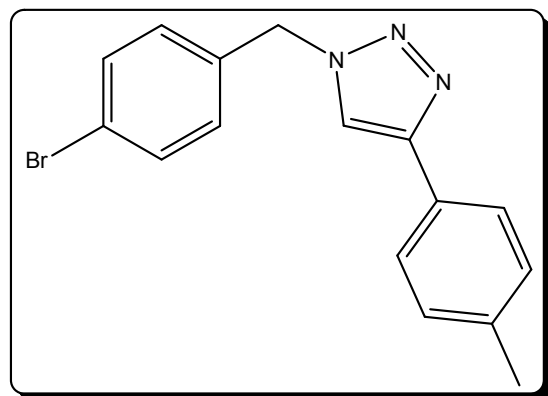

$^1\text{H}$  NMR ( $\text{CDCl}_3$ , 25  $^\circ\text{C}$ )  $\delta$  7.70-7.68 (d,  $J$  = 7.69 Hz, 2H), 7.51-7.49 (d,  $J$  = 8.42 Hz, 2H), 7.22-7.16 (m, 4H), 5.51 (s, 2H), 2.36 (s, 3H) ppm;  $^{13}\text{C}$  NMR ( $\text{CDCl}_3$ , 25  $^\circ\text{C}$ )  $\delta$  138.0, 133.7, 132.7, 129.5, 129.4, 127.4, 125.5, 122.8, 119.0, 53.4, 21.2 ppm.

**Table 5, Entry 19: 4-(4-Fluorophenyl)-1-(4-methylbenzyl)-1*H*-1,2,3-triazole:**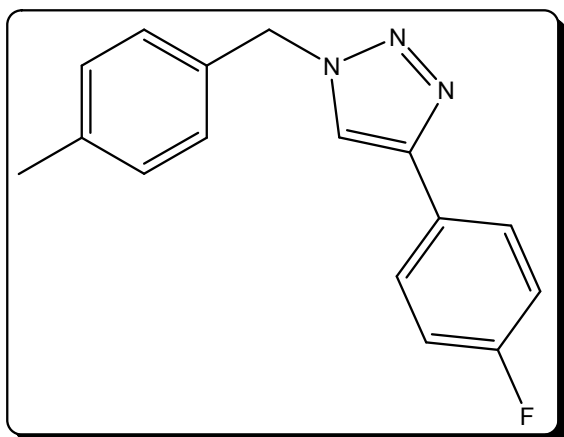

$^1\text{H}$  NMR ( $\text{CDCl}_3$ , 25  $^\circ\text{C}$ )  $\delta$  7.76-7.72 (m, 2H), 7.58 (s, 1H), 7.21-7.17 (m, 4H), 7.08-7.04 (m, 2H), 5.50 (s, 2H), 2.34 (s, 3H) ppm;  $^{13}\text{C}$  NMR ( $\text{CDCl}_3$ , 25  $^\circ\text{C}$ )  $\delta$  163.7, 147.2, 138.7, 131.4, 129.7, 128.0, 127.3, 127.2, 126.7, 119.1, 115.7, 115.5, 54.0, 21.1 ppm.

**Table 5, Entry 20: 1-(4-Methylbenzyl)-4-phenyl-1*H*-1,2,3-triazole:**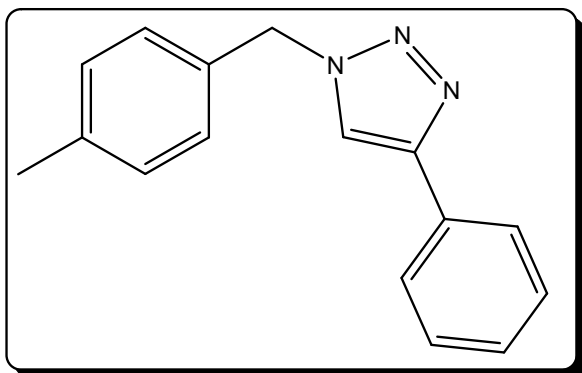

$^1\text{H}$  NMR ( $\text{CDCl}_3$ , 25  $^\circ\text{C}$ )  $\delta$  7.79-7.76 (m, 2H), 7.62 (s, 1H), 7.40-7.36 (m, 2H), 7.31-7.28 (m, 1H), 7.22-7.17 (m, 4H), 5.52 (s, 1H), 2.35 (s, 3H) ppm;  $^{13}\text{C}$  NMR ( $\text{CDCl}_3$ , 25  $^\circ\text{C}$ )  $\delta$  148.0, 138.6, 131.5, 130.5, 129.7, 128.7, 128.0, 125.6, 119.3, 53.9, 21.1 ppm.

**Table 5, Entry 21: 1-(4-Methylbenzyl)-4-*p*-tolyl-1*H*-1,2,3-triazole:**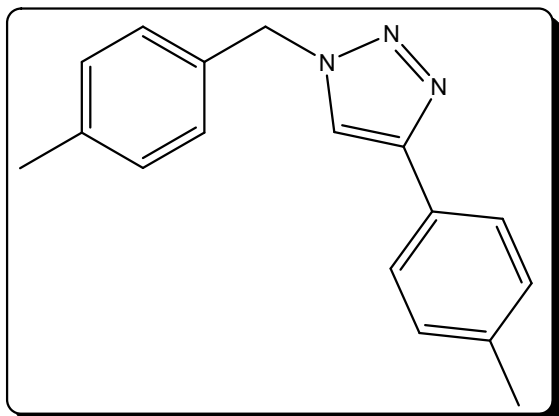

$^1\text{H}$  NMR ( $\text{CDCl}_3$ , 25  $^\circ\text{C}$ )  $\delta$  7.68-7.65 (m, 2H), 7.58 (s, 1H), 7.22-7.17 (m, 6H), 5.51 (s, 2H), 2.35 (s, 6H) ppm;  $^{13}\text{C}$  NMR ( $\text{CDCl}_3$ , 25  $^\circ\text{C}$ )  $\delta$  138.6, 137.9, 131.6, 129.7, 129.4, 128.1, 127.7, 125.5, 54.0, 21.2, 21.1 ppm.

**Table 5, Entry 22: 1-(4-Nitrobenzyl)-4-hexyl-1*H*-1,2,3-triazole:**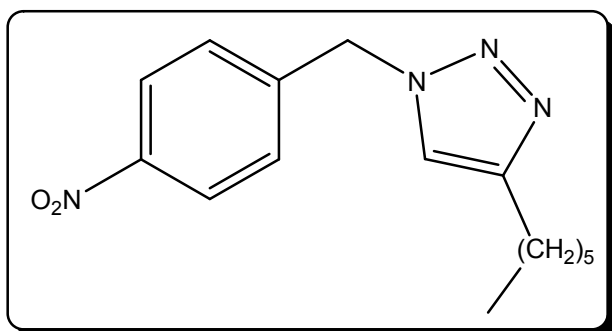

$^1\text{H}$  NMR ( $\text{CDCl}_3$ , 25  $^\circ\text{C}$ )  $\delta$  8.14-8.11 (m, 2H), 7.32-7.21 (m, 3H), 5.54 (s, 2H), 2.65-2.40 (m, 2H), 1.61-1.44 (m, 2H), 1.25-1.15 (m, 6H), 0.80-0.77 (t,  $J$  = 6.59 Hz, 3H) ppm;  $^{13}\text{C}$  NMR ( $\text{CDCl}_3$ , 25  $^\circ\text{C}$ )  $\delta$  149.4, 147.8, 142.0, 128.3, 127.7,

124.1, 124.0, 120.7, 52.8, 31.4, 29.2, 28.8, 25.5, 22.4, 13.9 ppm.

**Table 5, Entry 23: 1-(4-Bromobenzyl)-4-hexyl-1*H*-1,2,3-triazole:**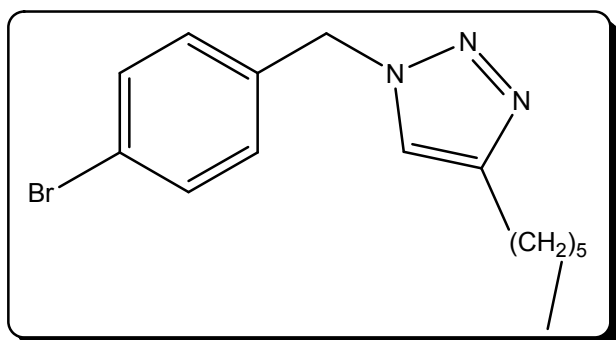

$^1\text{H}$  NMR ( $\text{CDCl}_3$ , 25  $^\circ\text{C}$ )  $\delta$  7.42-7.40 (d,  $J$  = 8.42 Hz 2H), 7.12 (s, 1H), 7.005-6.93 (m, 2H), 5.36 (s, 2H), 2.62-2.38 (t,  $J$  = 7.69 Hz, 2H), 1.59-1.40 (m, 2H), 1.25-1.15 (m, 6H), 0.80-0.77 (t,  $J$  = 6.95 Hz, 3H) ppm,  $^{13}\text{C}$  NMR ( $\text{CDCl}_3$ , 25  $^\circ\text{C}$ )  $\delta$

149.1, 133.9, 132.1, 129.4, 128.7, 122.6, 120.4, 53.1, 31.4, 29.2, 28.8, 25.6, 22.4, 13.9 ppm.



### 3. $^1\text{H}$ NMR and $^{13}\text{C}$ NMR spectra of isolated compounds

Table 5, Entry 2: 1-Benzyl-4-phenyl-1*H*-1,2,3,-triazole:

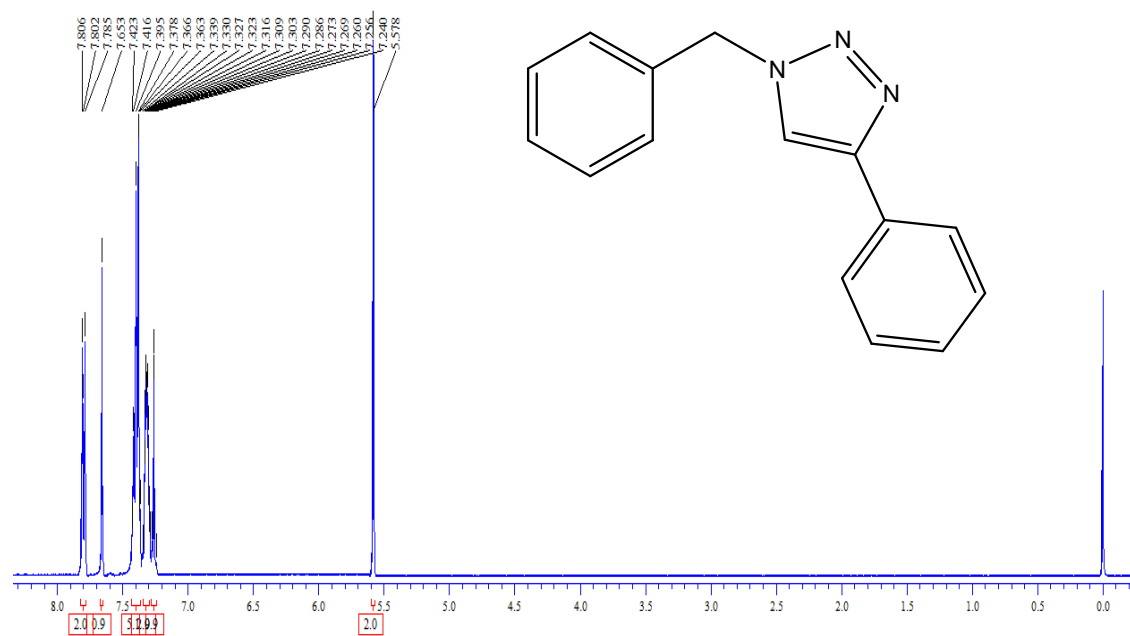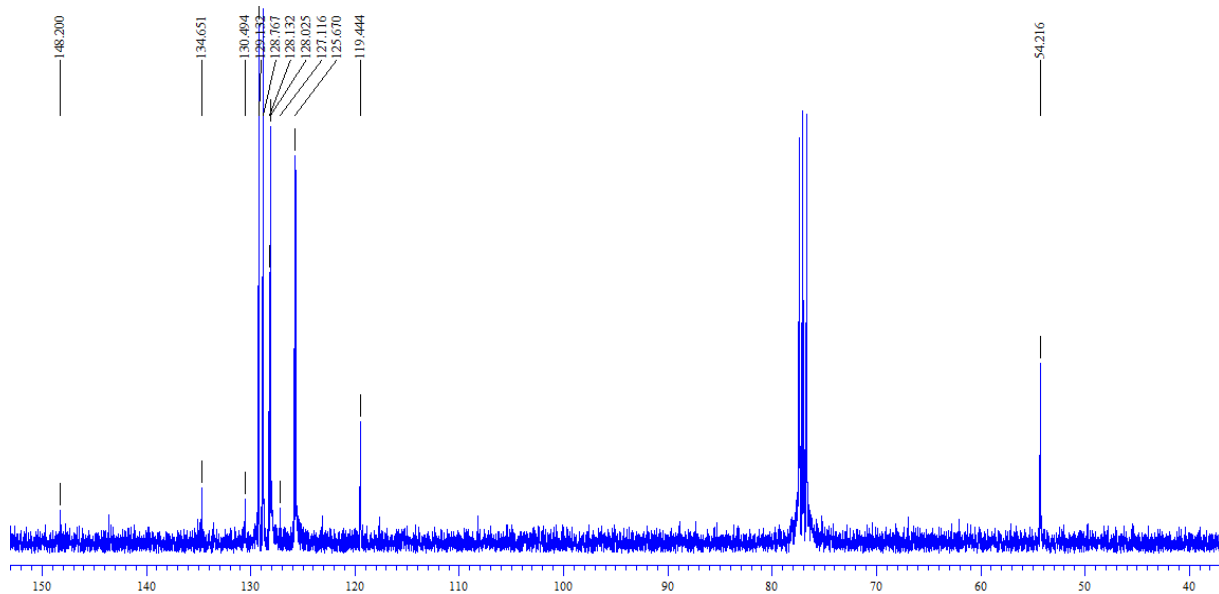

Table 5, Entry 3: 2-((4-Phenyl-1H-1,2,3-triazol-1-yl)methyl)pyridine:

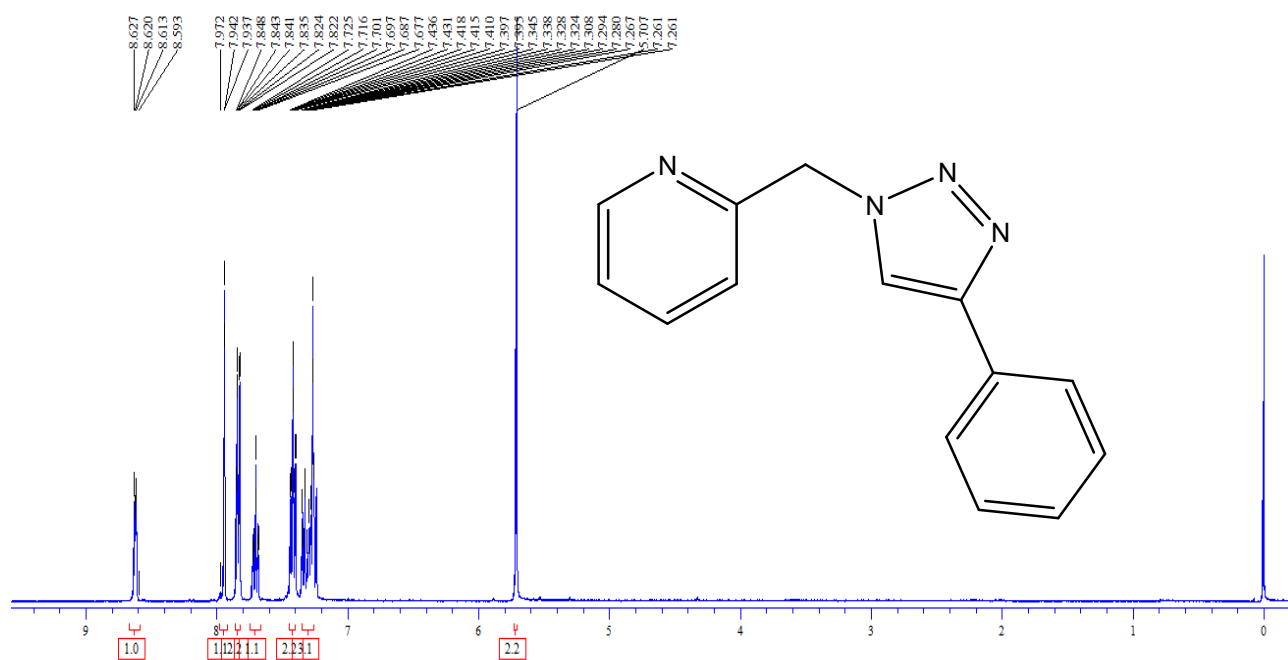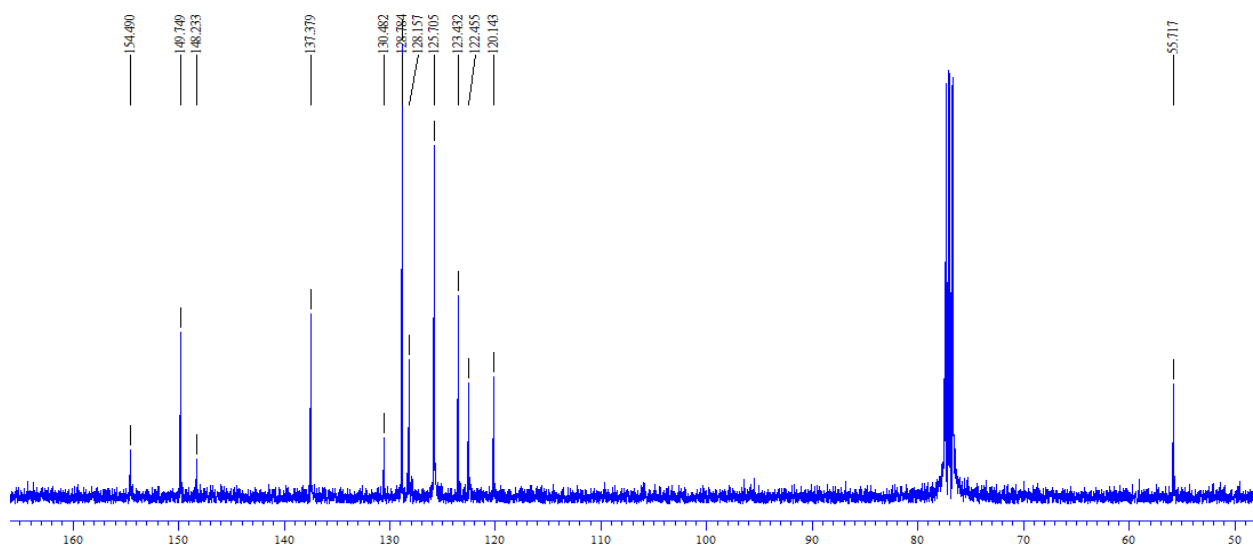

**Table 5, Entry 4: 2-((4-*p*-Tolyl-1*H*-1,2,3-triazol-1-yl)methyl)pyridine:**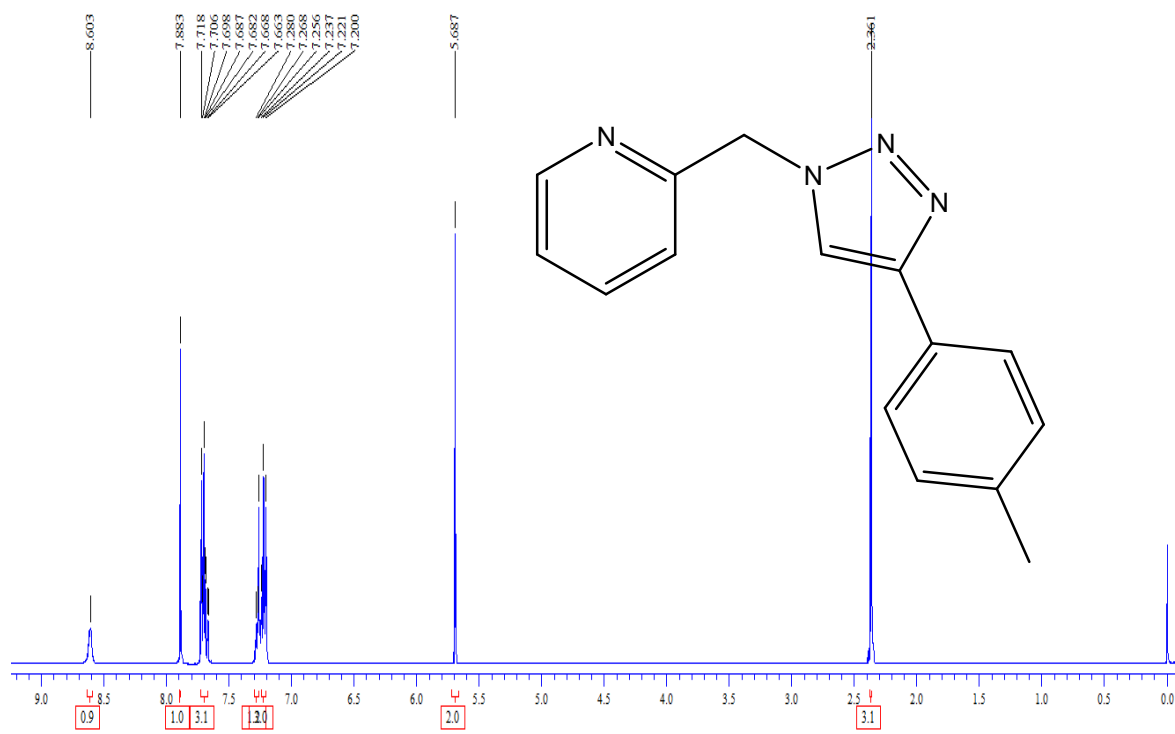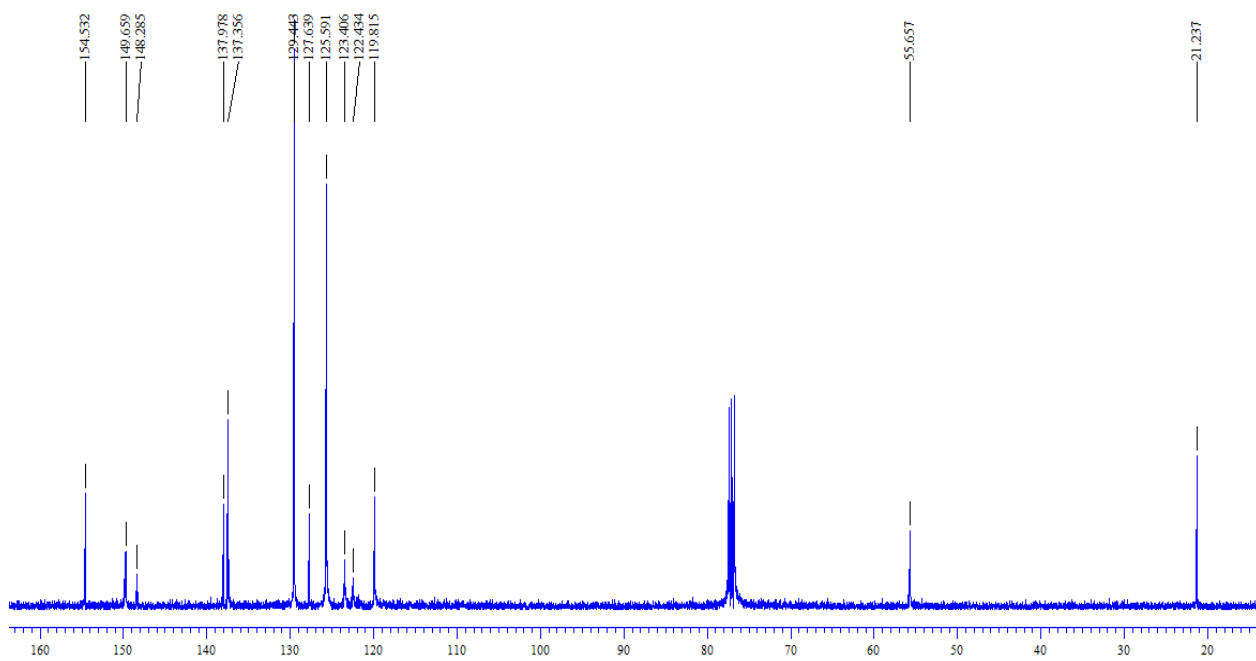

**Table 5, Entry 5: 2-((4-(4-Fluorophenyl)-1H-1,2,3-triazol-1-yl)methyl)pyridine:**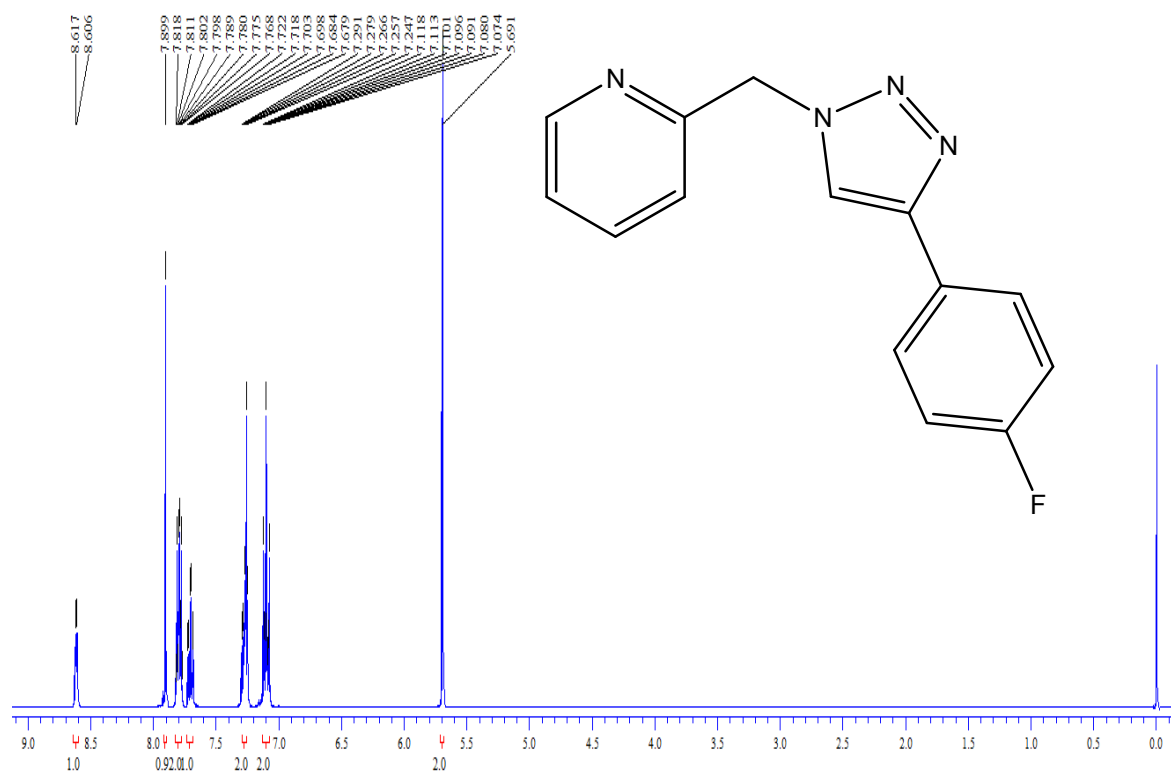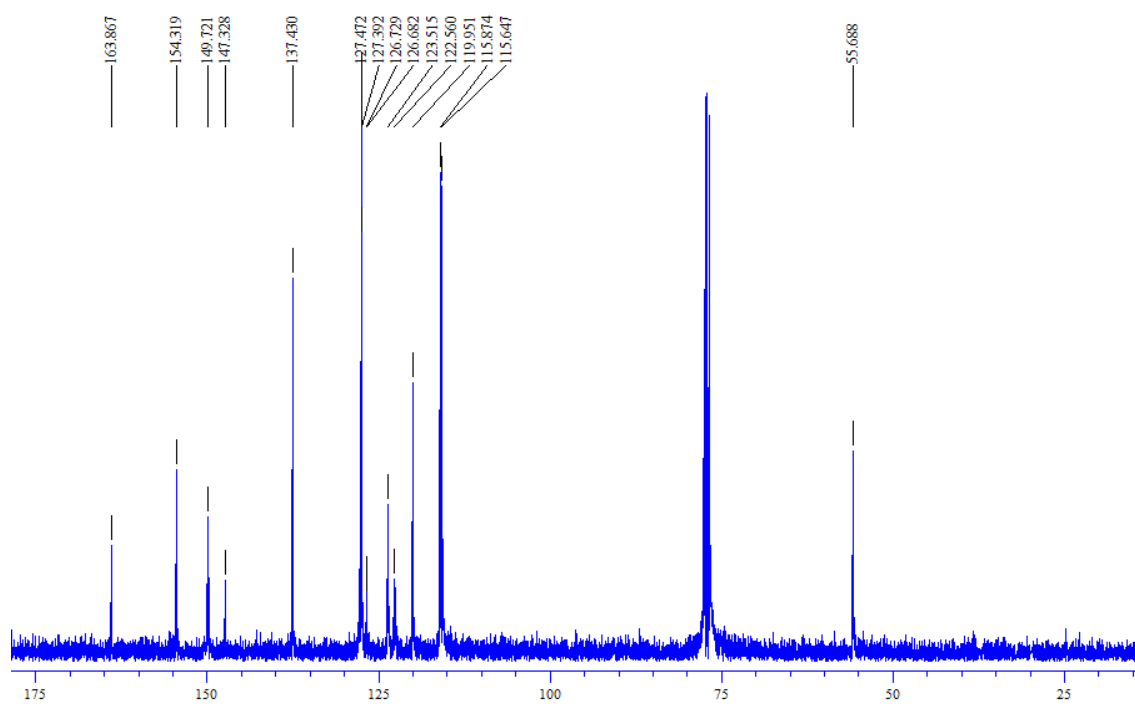

**Table 5, Entry 6: 1-Benzyl-4-*p*-tolyl-1*H*-1,2,3-triazole:**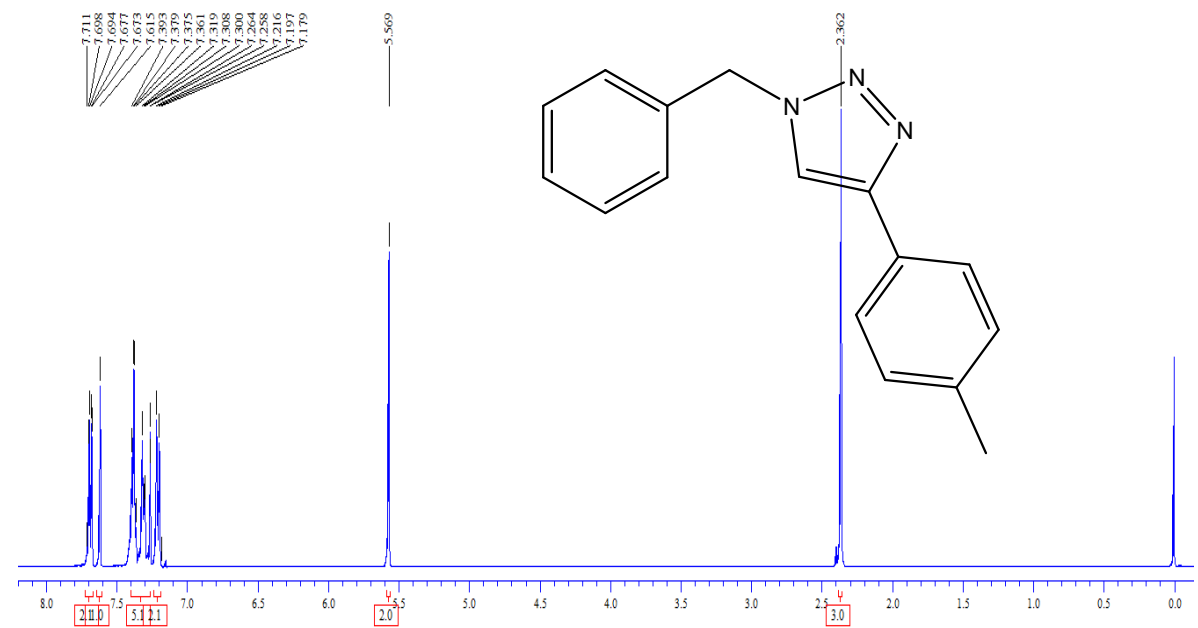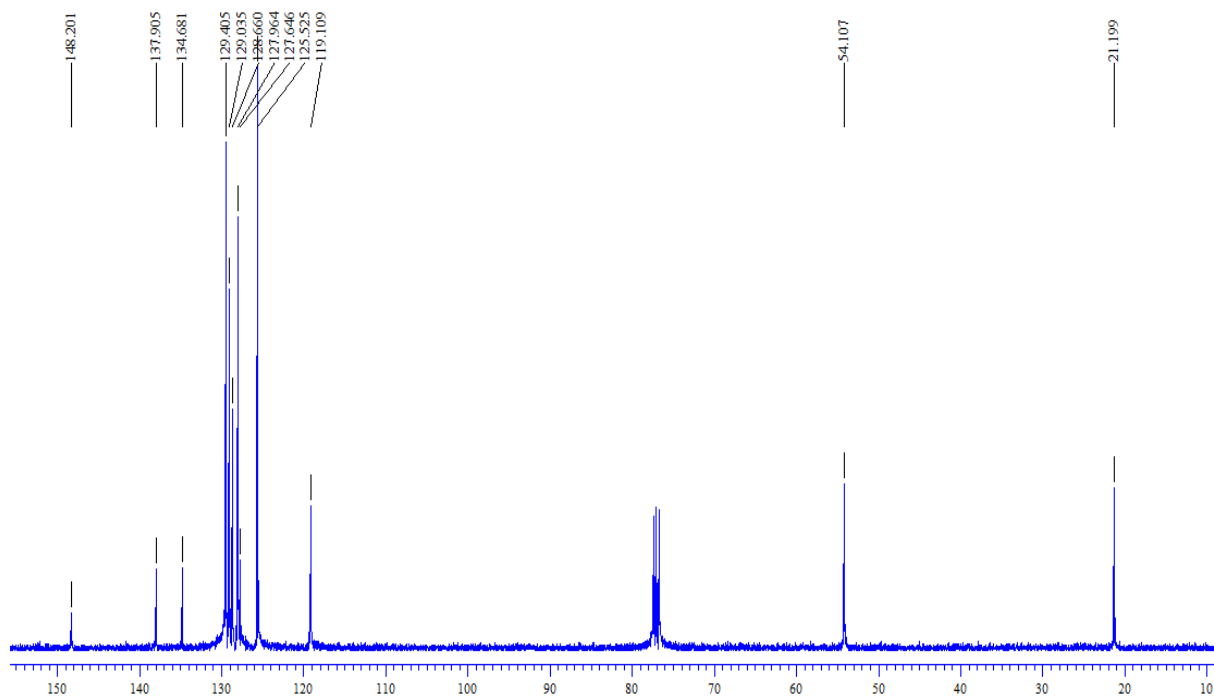

**Table 5, Entry 7: 1-(4-Methoxybenzyl)-4-*p*-tolyl-1*H*-1,2,3-triazole:**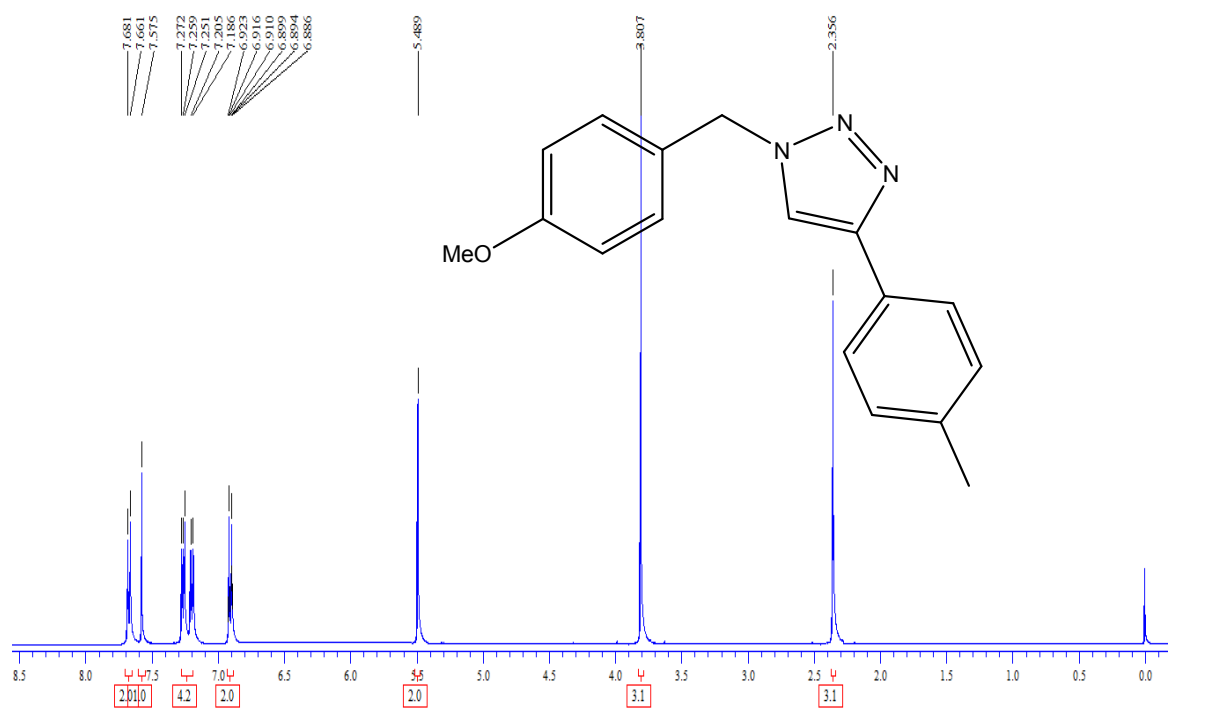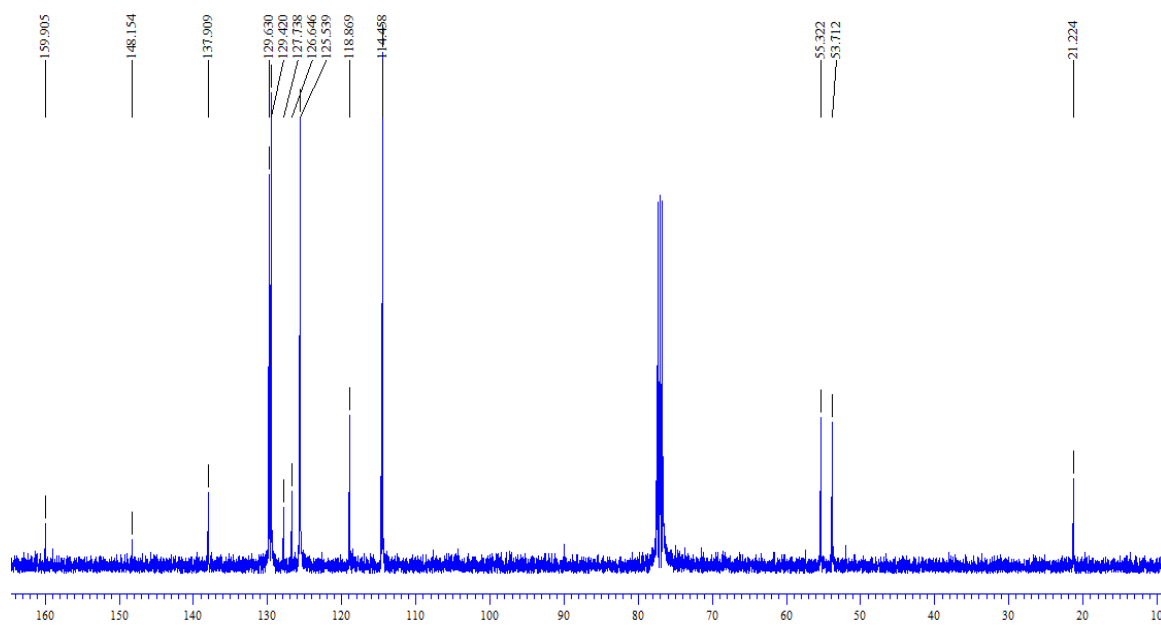

**Table 5, Entry 8: 1-(4-Methoxybenzyl)-4-(4-fluorophenyl)-1H-1,2,3-triazole:**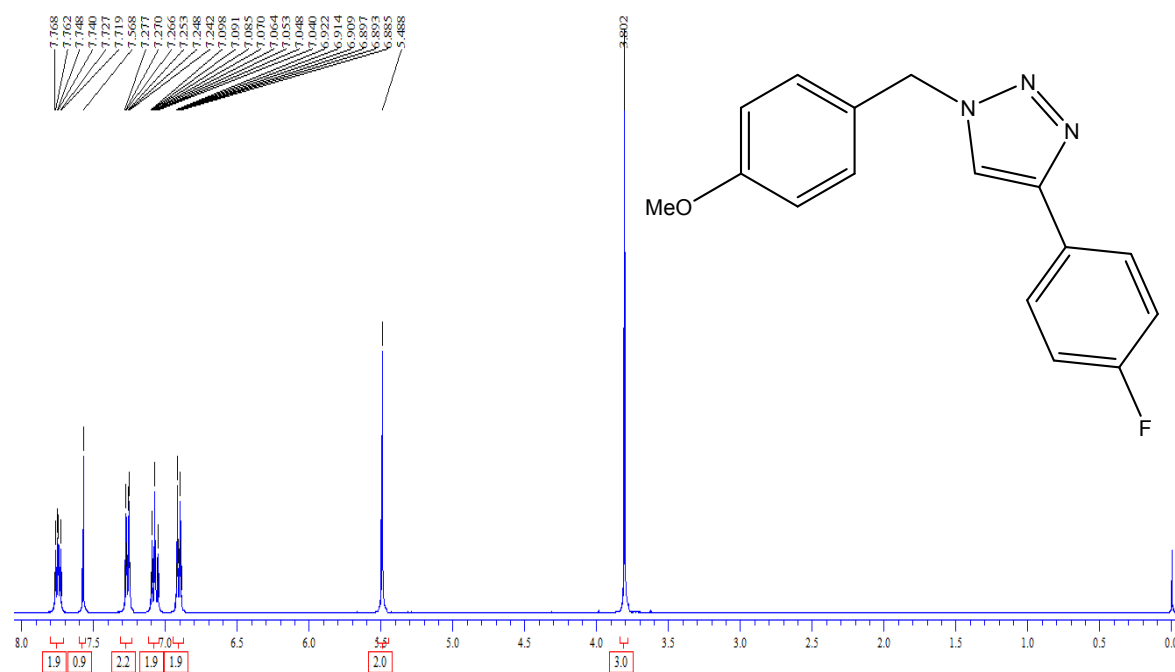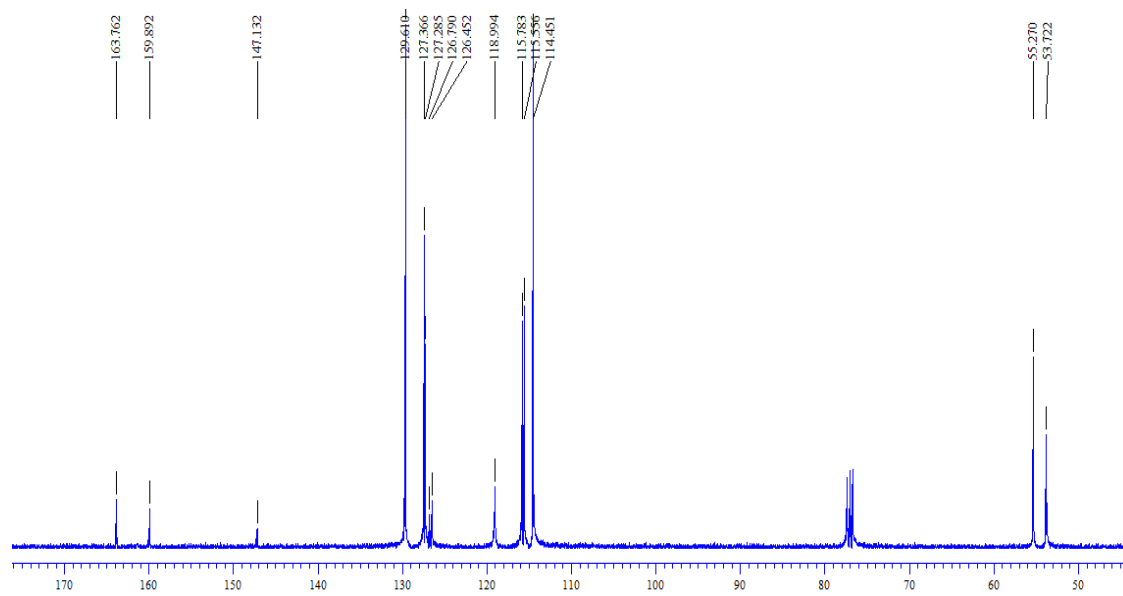

**Table 5, Entry 9: 1-(4-Methoxybenzyl)-4-phenyl-1H-1,2,3-triazole:**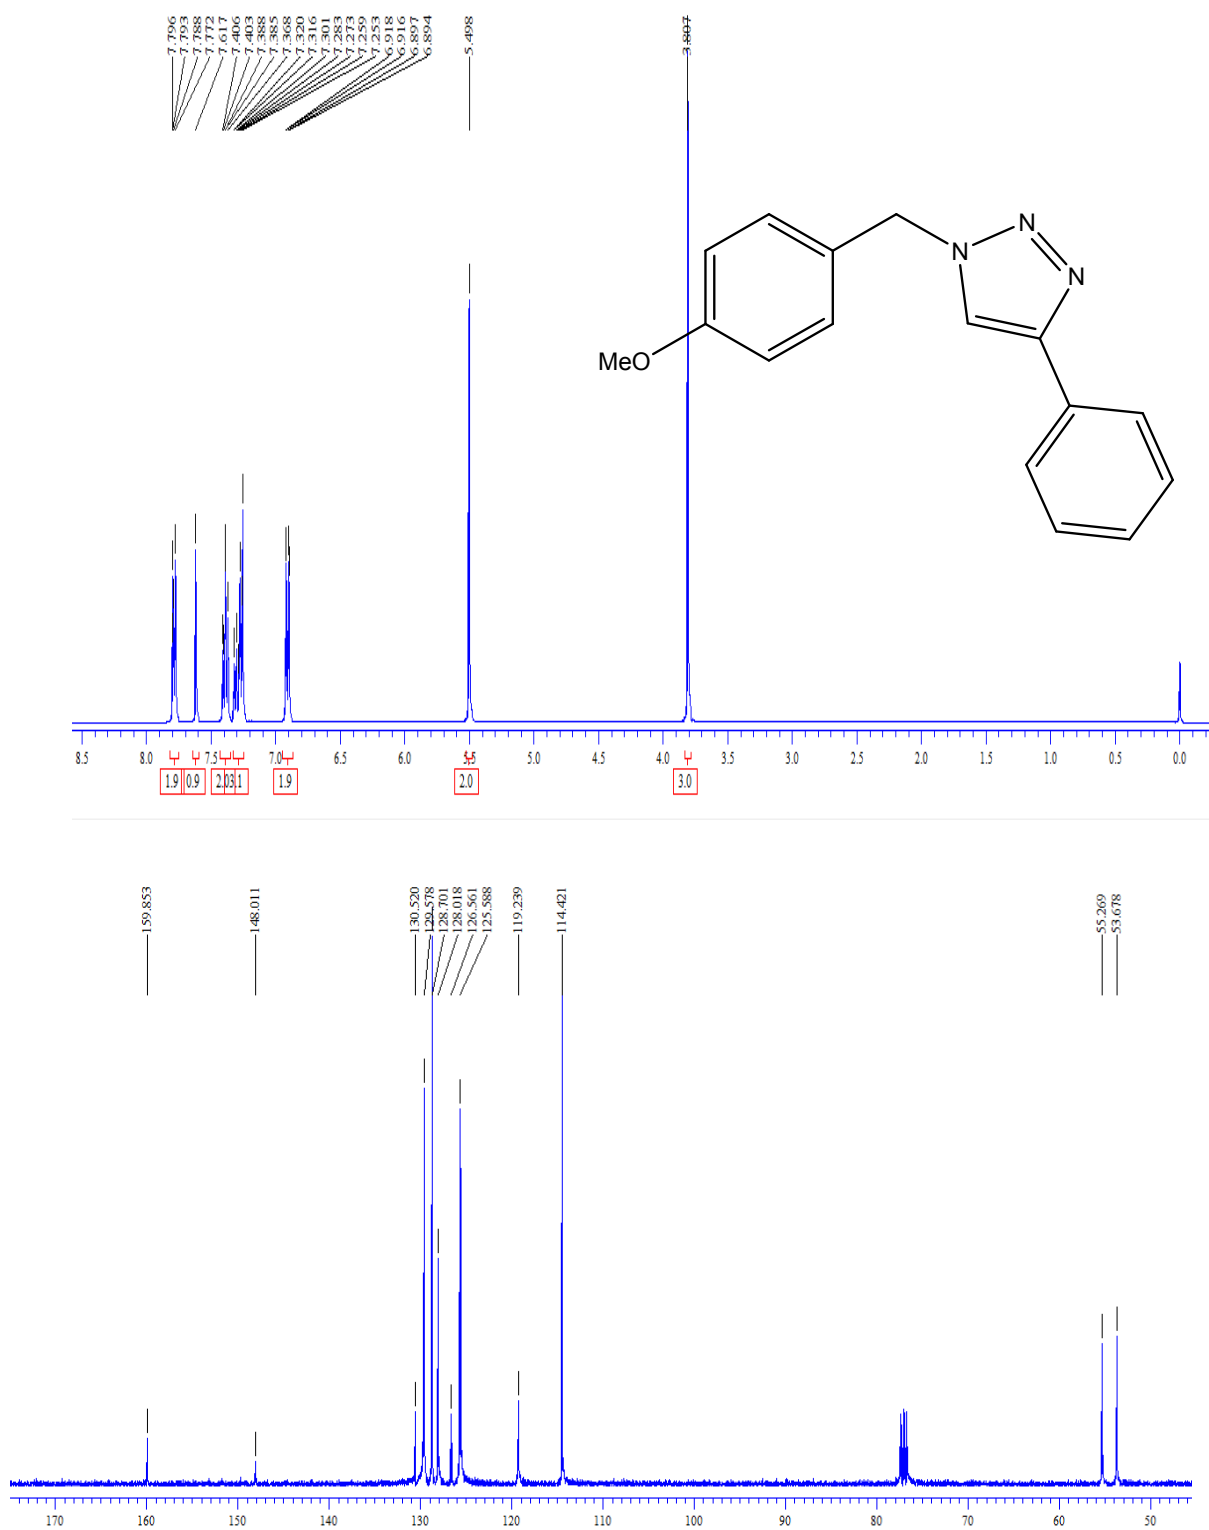



**Table 5, Entry 10: 1-Benzyl-4-(4-fluorophenyl)-1H-1,2,3-triazole:**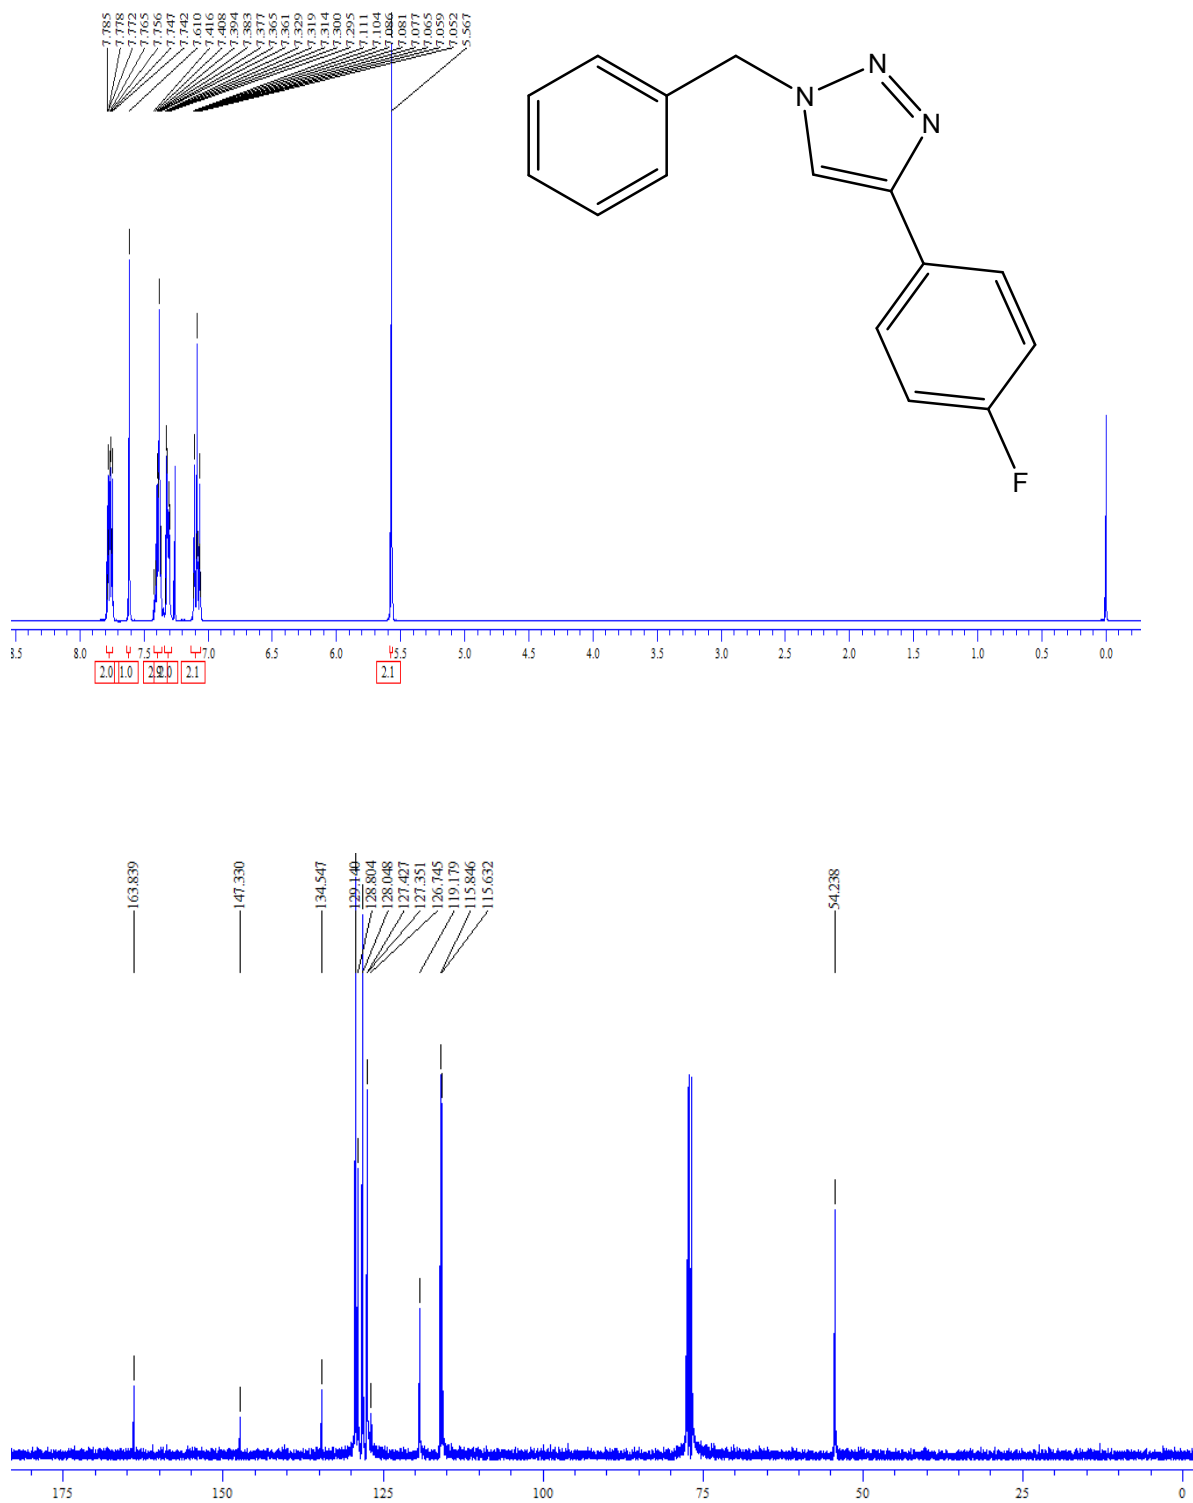

**Table 5, Entry 12: 1-(4-Nitrobenzyl)-4-*p*-tolyl-1*H*-1,2,3-triazole:**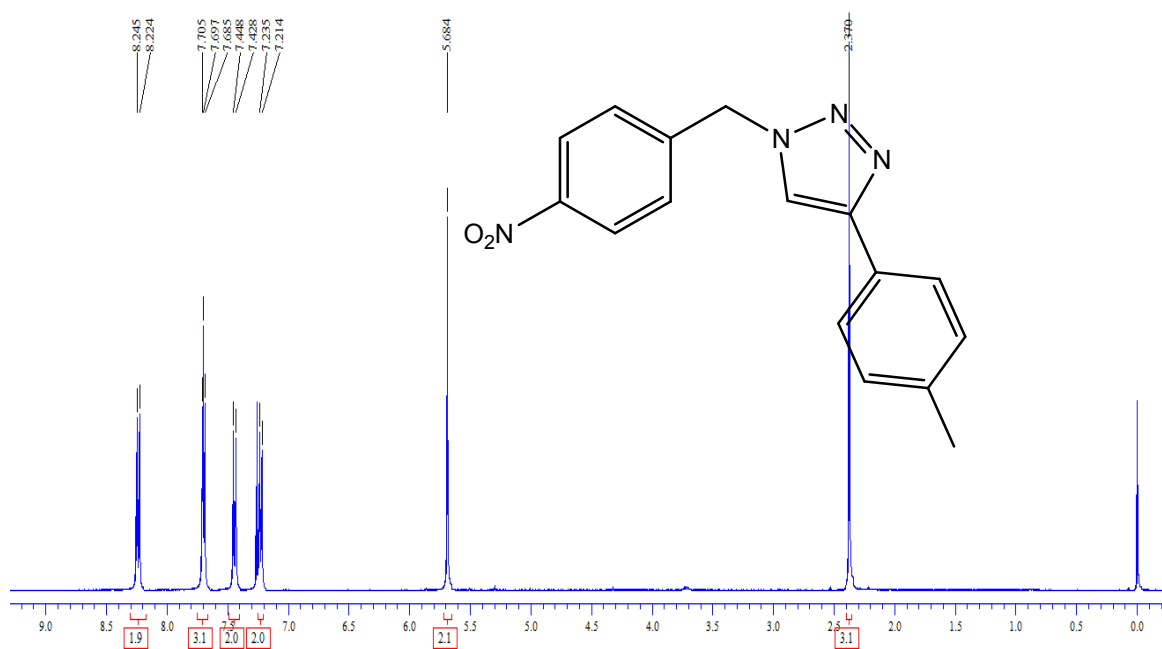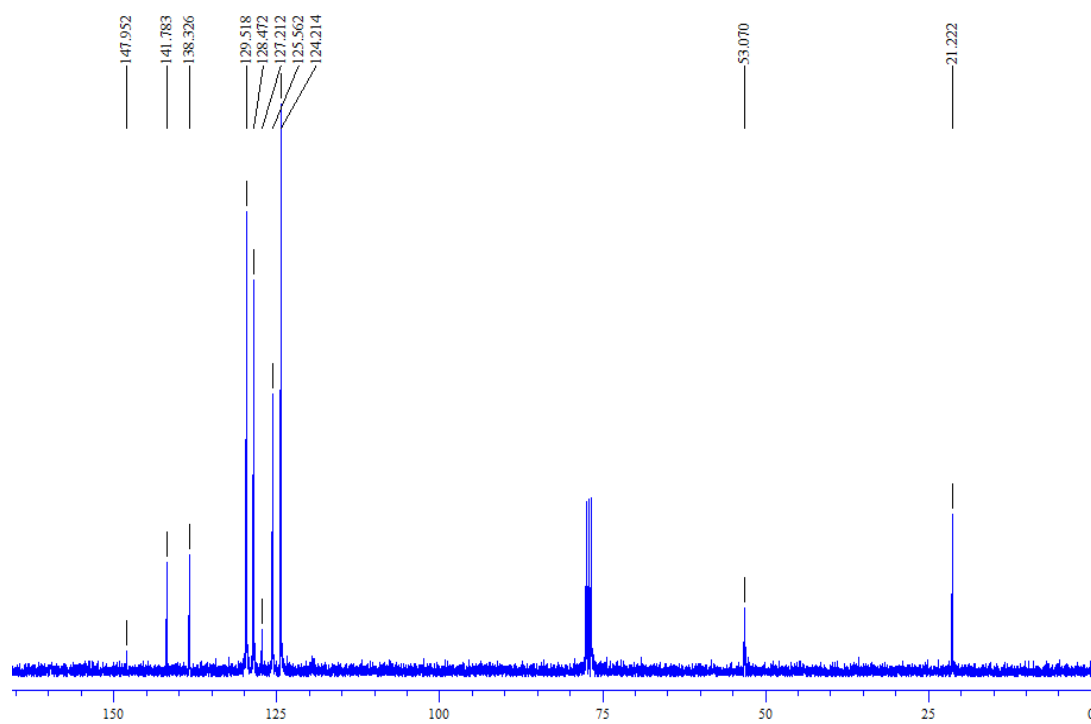

**Table 5, Entry 13: 1-(4-Nitrobenzyl)-4-(4-fluorophenyl)-1H-1,2,3-triazole:**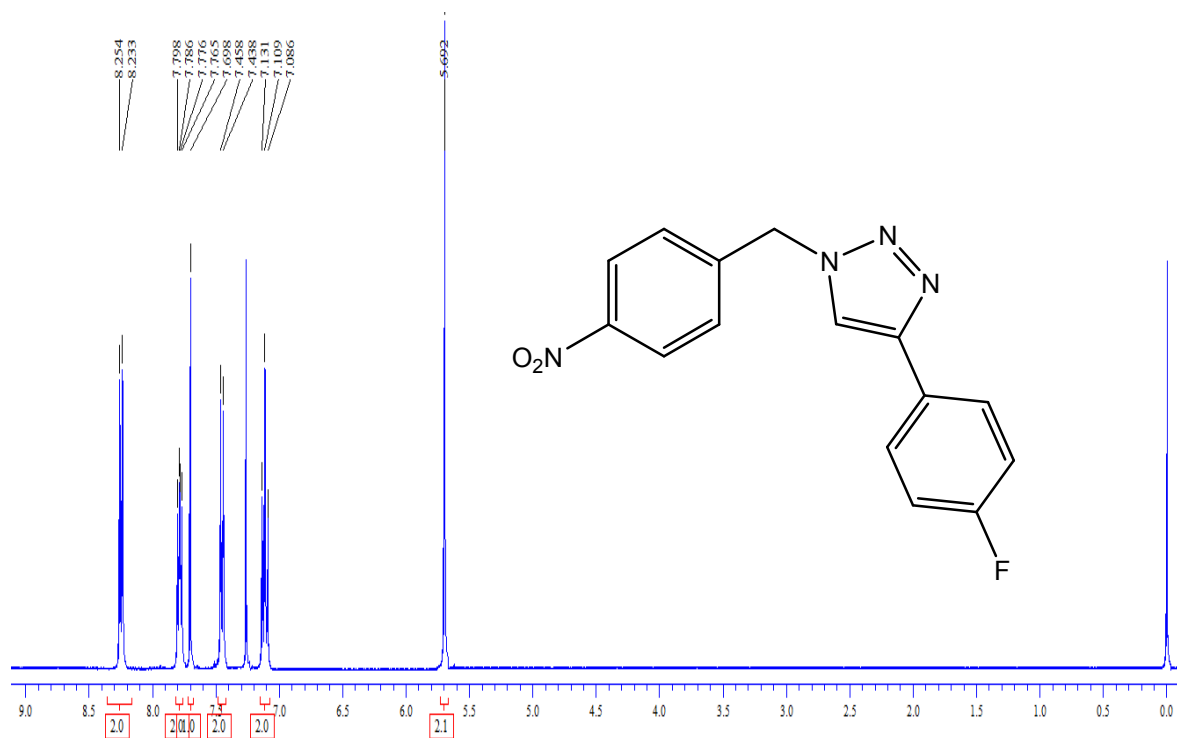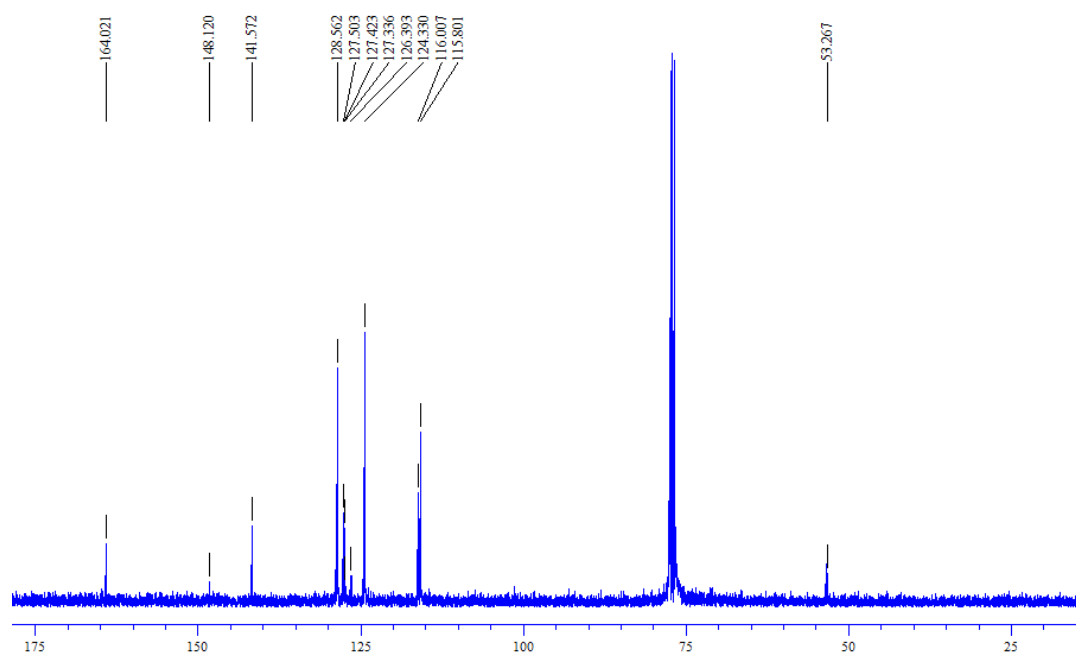

**Table 5, Entry 14: 1-(4-Bromobenzyl)-4-*p*-tolyl-1*H*-1,2,3-triazole:**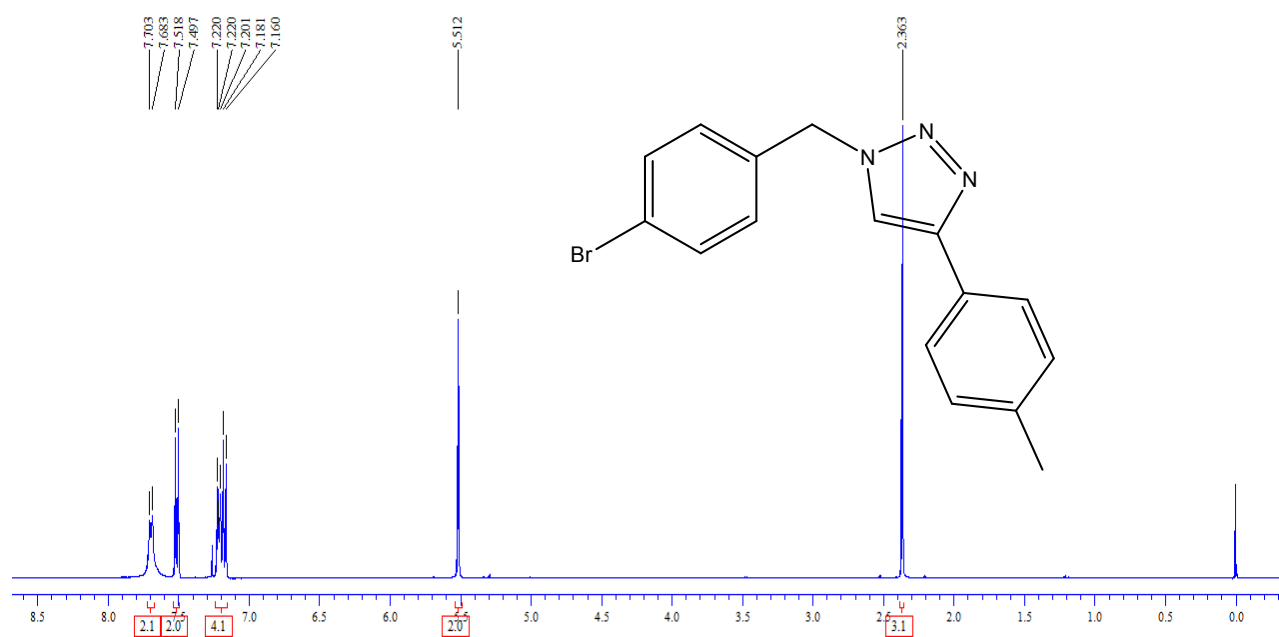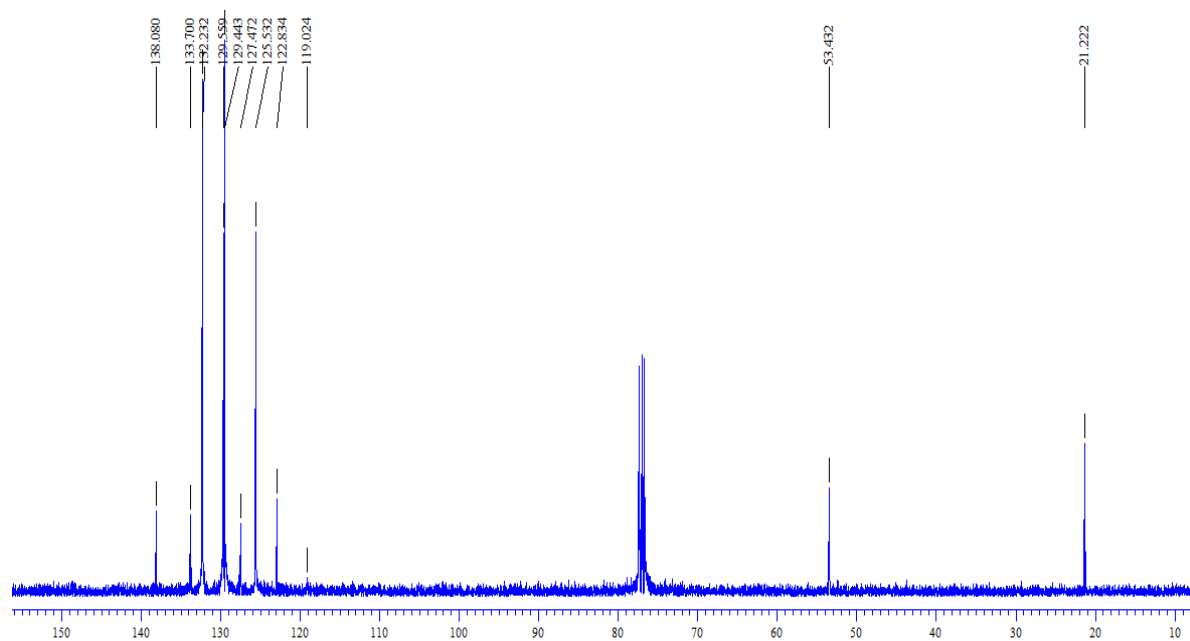

**Table 5, Entry 19: 4-(4-Fluorophenyl)-1-(4-methylbenzyl)-1H-1,2,3-triazole:**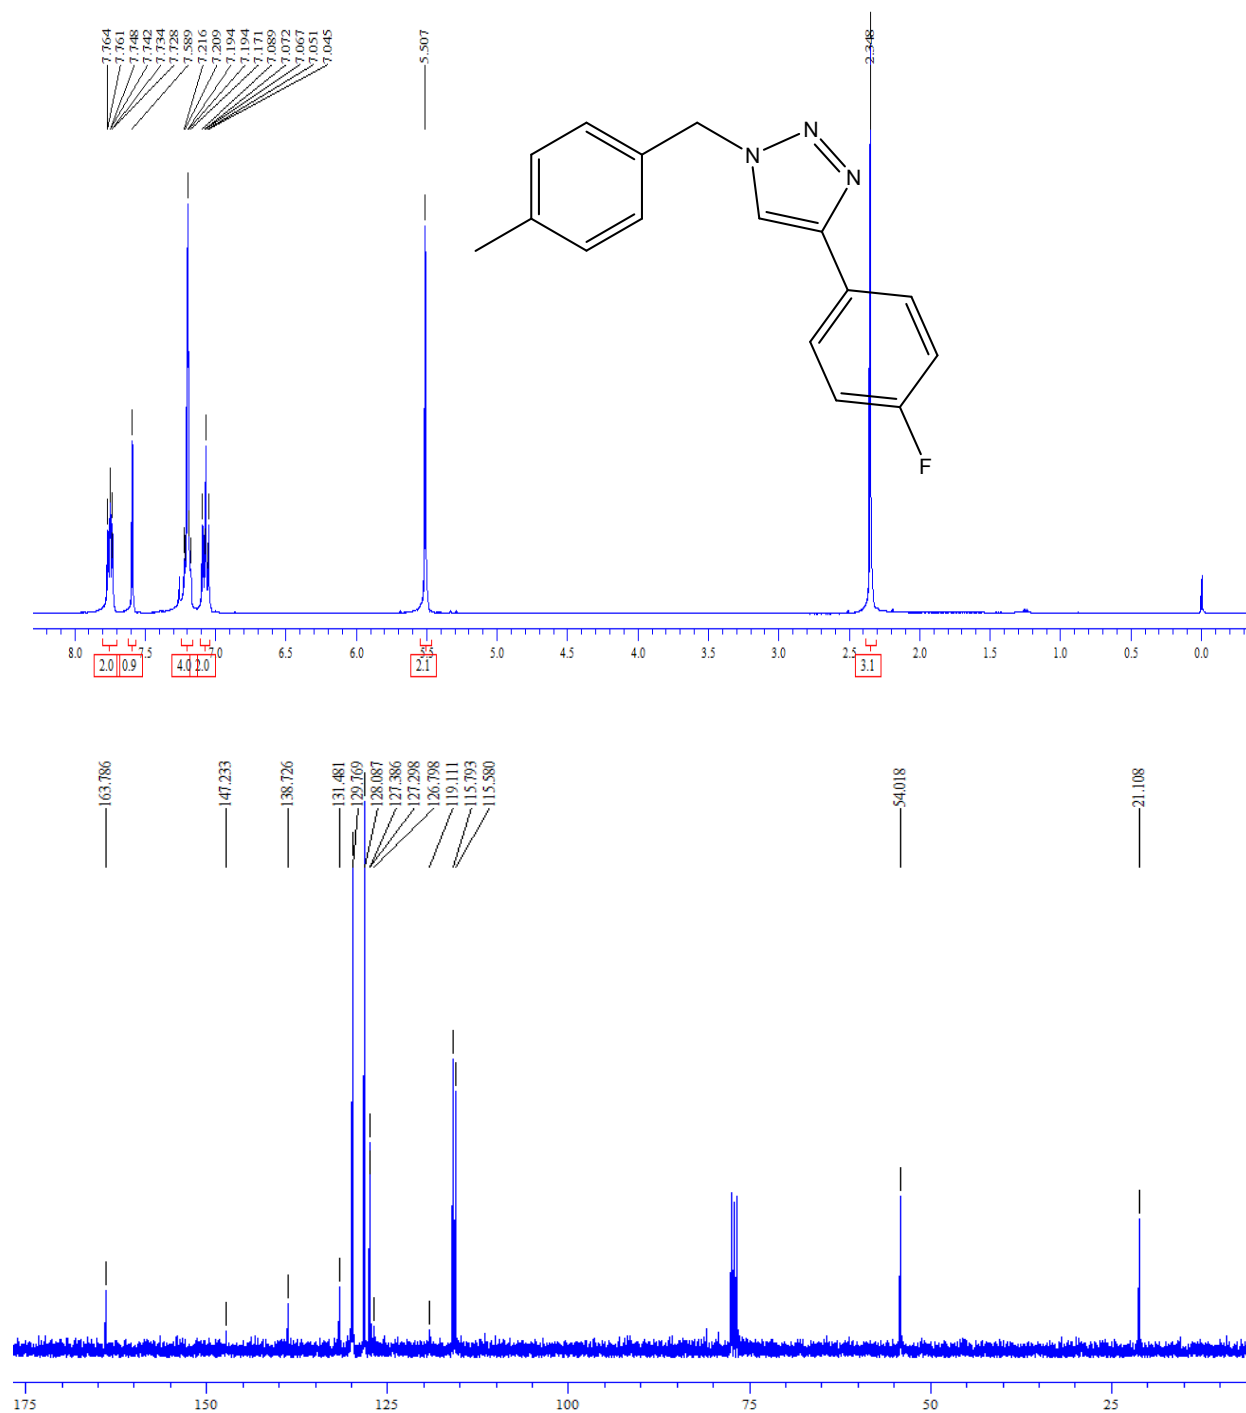

**Table 5, Entry 20: 1-(4-Methylbenzyl)-4-phenyl-1H-1,2,3-triazole:**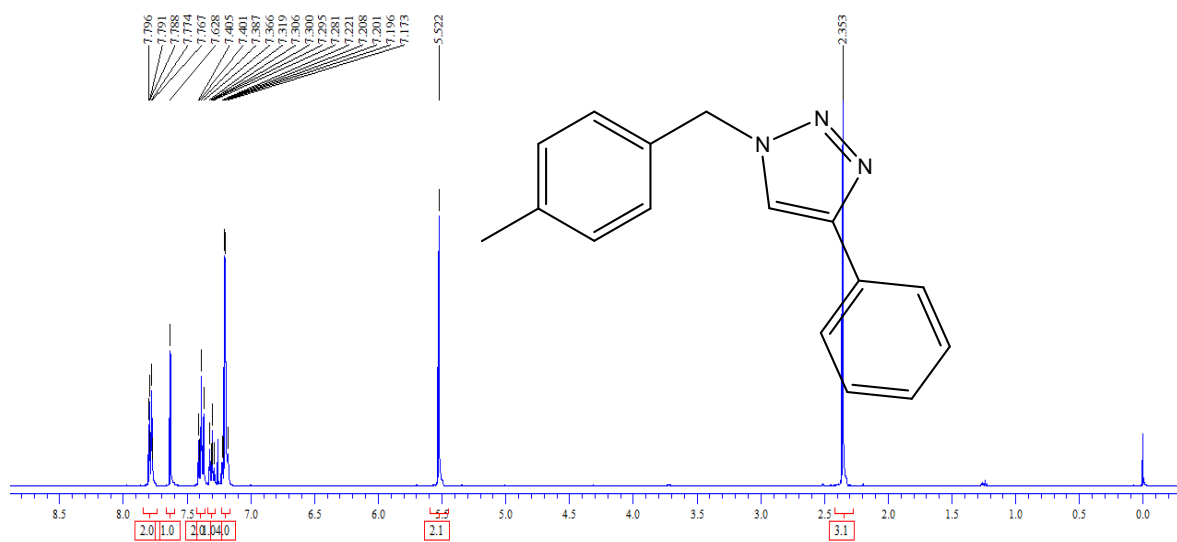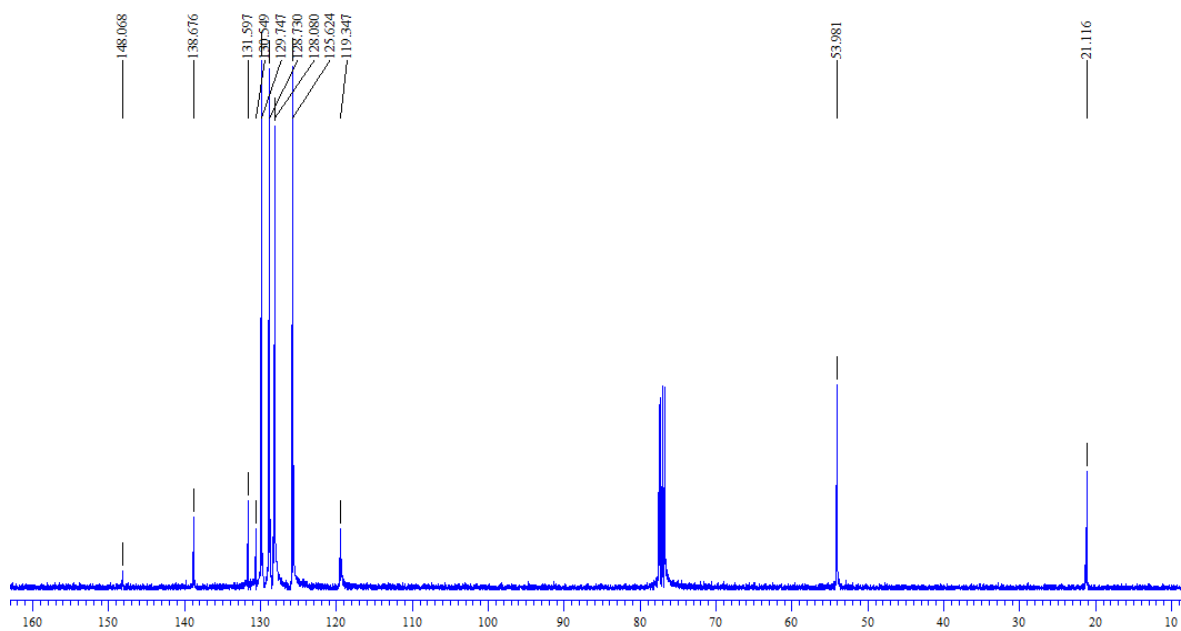

**Table 5, Entry 21: 1-(4-Methylbenzyl)-4-*p*-tolyl-1*H*-1,2,3-triazole:**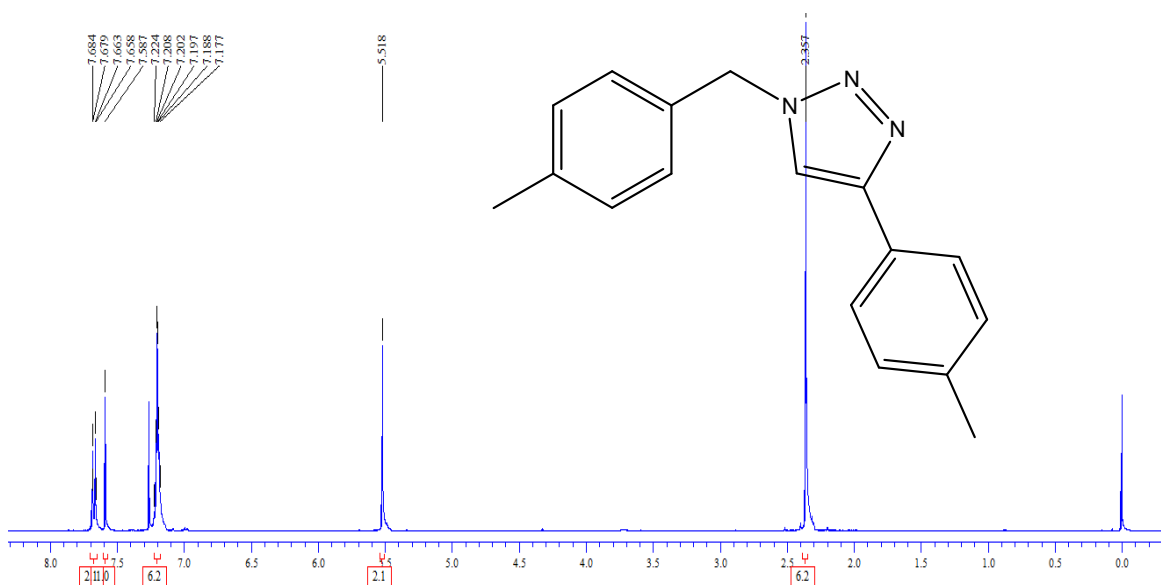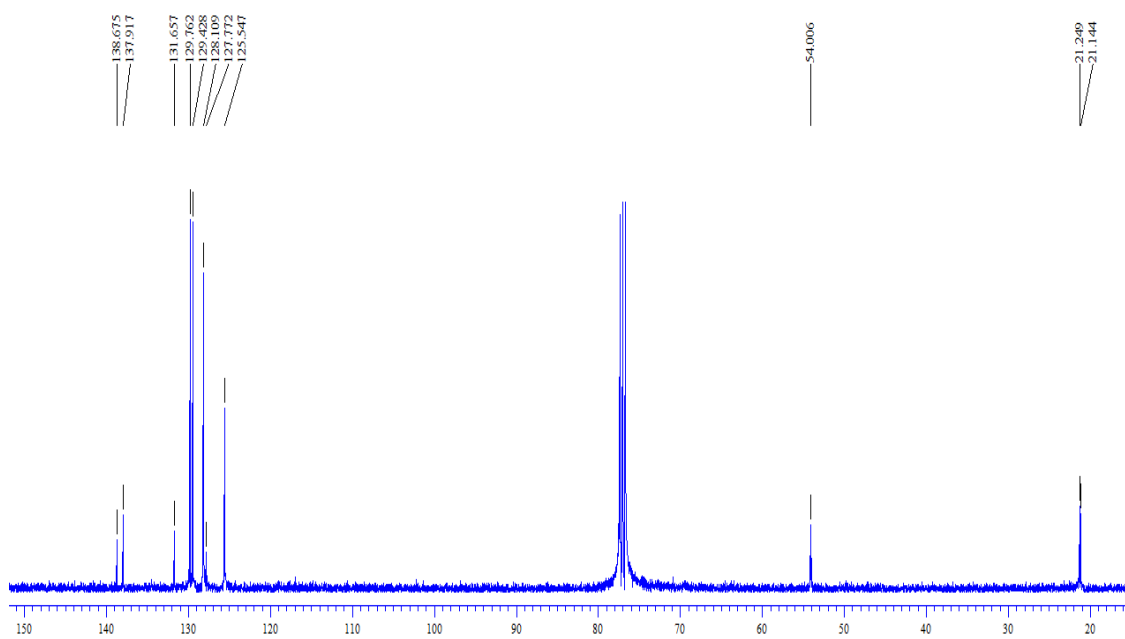

**Table 5, Entry 22: 1-(4-Nitrobenzyl)-4-hexyl-1H-1,2,3-triazole:**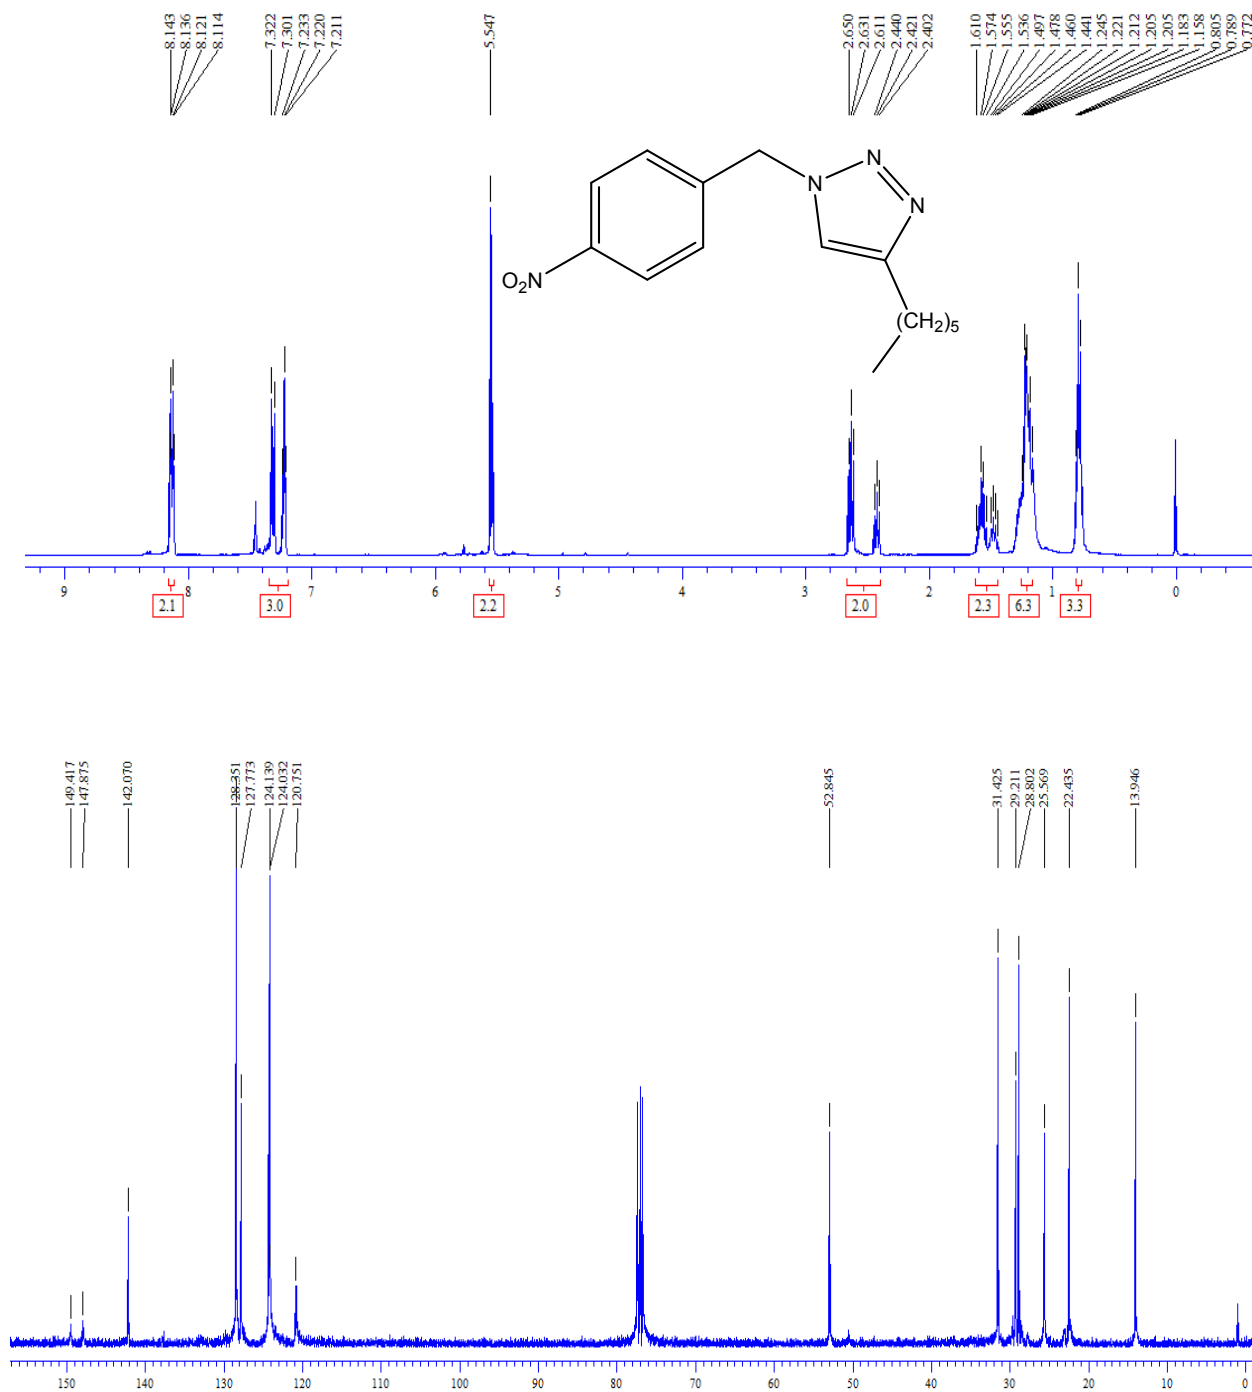



Table 5, Entry 23: 1-(4-Bromobenzyl)-4-hexyl-1H-1,2,3-triazole:

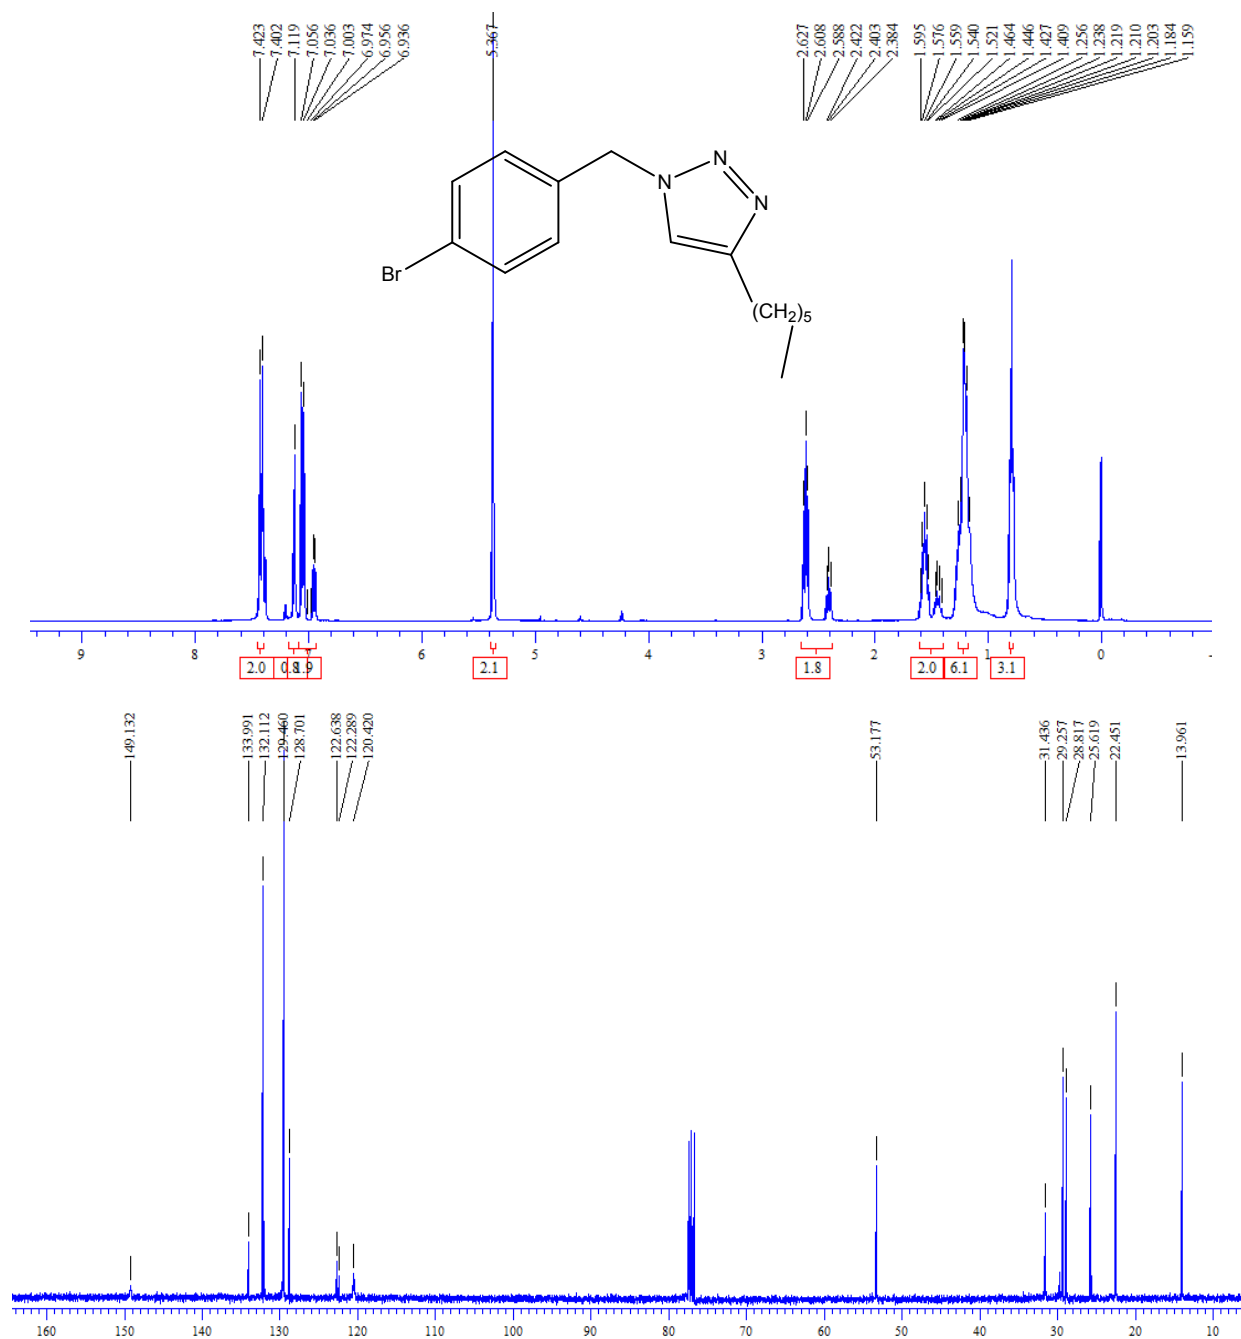

Supplement: c4ra04093g1.pdf [file c4ra04093g1.pdf]
